# Supplementary material for: A comparative study on the N-heterocyclic carbene adducts of Ih-C60, D5h-C70 and Sc3N@Ih-C80
Source: Royal Society of Chemistry journal article supplement (doi:10.1039/c7cp02696j), 2017-01-01
Supplement: c7cp02696j1.pdf [file c7cp02696j1.pdf]

**Electronic supplementary information**

**Comparative study on the N-heterocyclic carbene adducts of  $I_h$ -C<sub>60</sub>,  $D_{5h}$ -C<sub>70</sub> and**

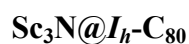

Peng Jin,<sup>\*a</sup> Le Yang,<sup>a</sup> Chang Liu,<sup>a</sup> Muqing Chen,<sup>b</sup> Qinghua Hou,<sup>a</sup> Lanlan Li<sup>\*a</sup> and

Yujun Zhao<sup>\*c</sup>

*<sup>a</sup>Key Laboratory for New Type of Functional Materials in Hebei Province, School of Materials Science and Engineering, Hebei University of Technology, Tianjin 300130, P. R. China.*

*E-mail: china.peng.jin@gmail.com (P. J.); liabc@hebut.edu.cn (L. L.)*

*<sup>b</sup>Department of Materials Physics, School of Physics and Mechanical & Electrical Engineering, Hubei University of Education, 129 Gaoxin 2nd Rd, Wuhan Hi-Tech Zone, Wuhan 430205, P.R. China*

*<sup>c</sup>Key Laboratory for Green Chemical Technology of Ministry of Education, Collaborative Innovation Centre of Chemical Science and Engineering, School of Chemical Engineering and Technology, Tianjin University, Tianjin 30072, People's Republic of China.*

*E-mail: yujunzhao@tju.edu.cn*

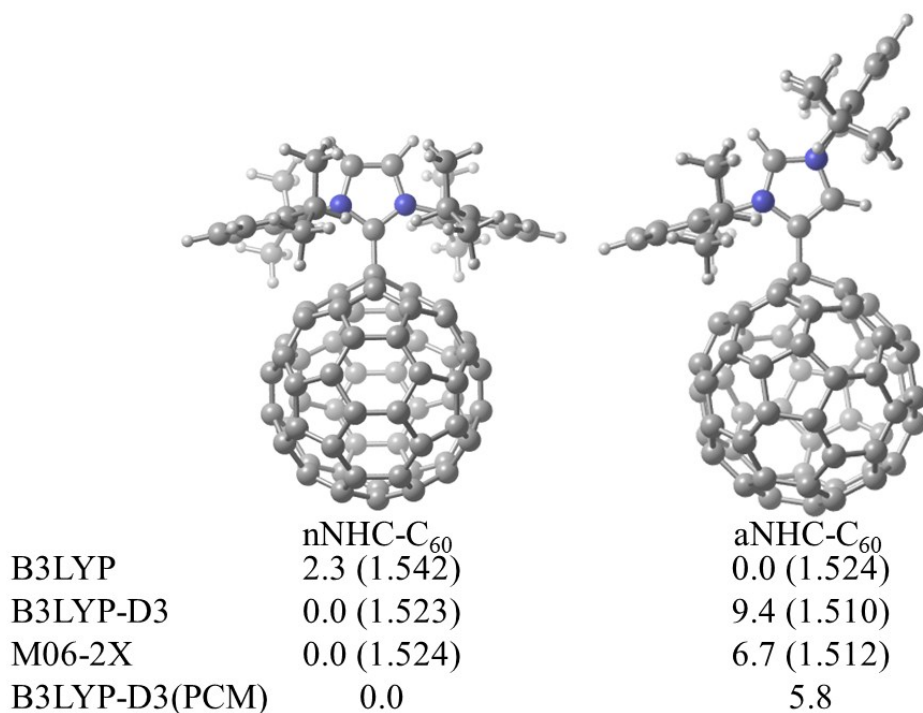

**Fig. S1** Optimized geometries (B3LYP-D3/6-31G\* level) of the two NHC-C<sub>60</sub> adducts with relative energies (kcal mol<sup>-1</sup>) and  $R_{CC}$  distances (Å, in parentheses) obtained at different levels of theory.

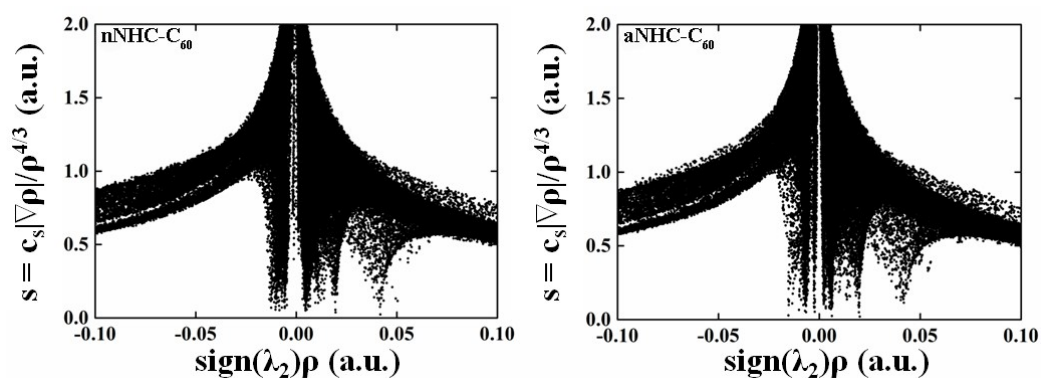

**Fig. S2** Plots of the RDG versus  $\text{sign}(\lambda_2)\rho$  value for the two NHC-C<sub>60</sub> adducts.

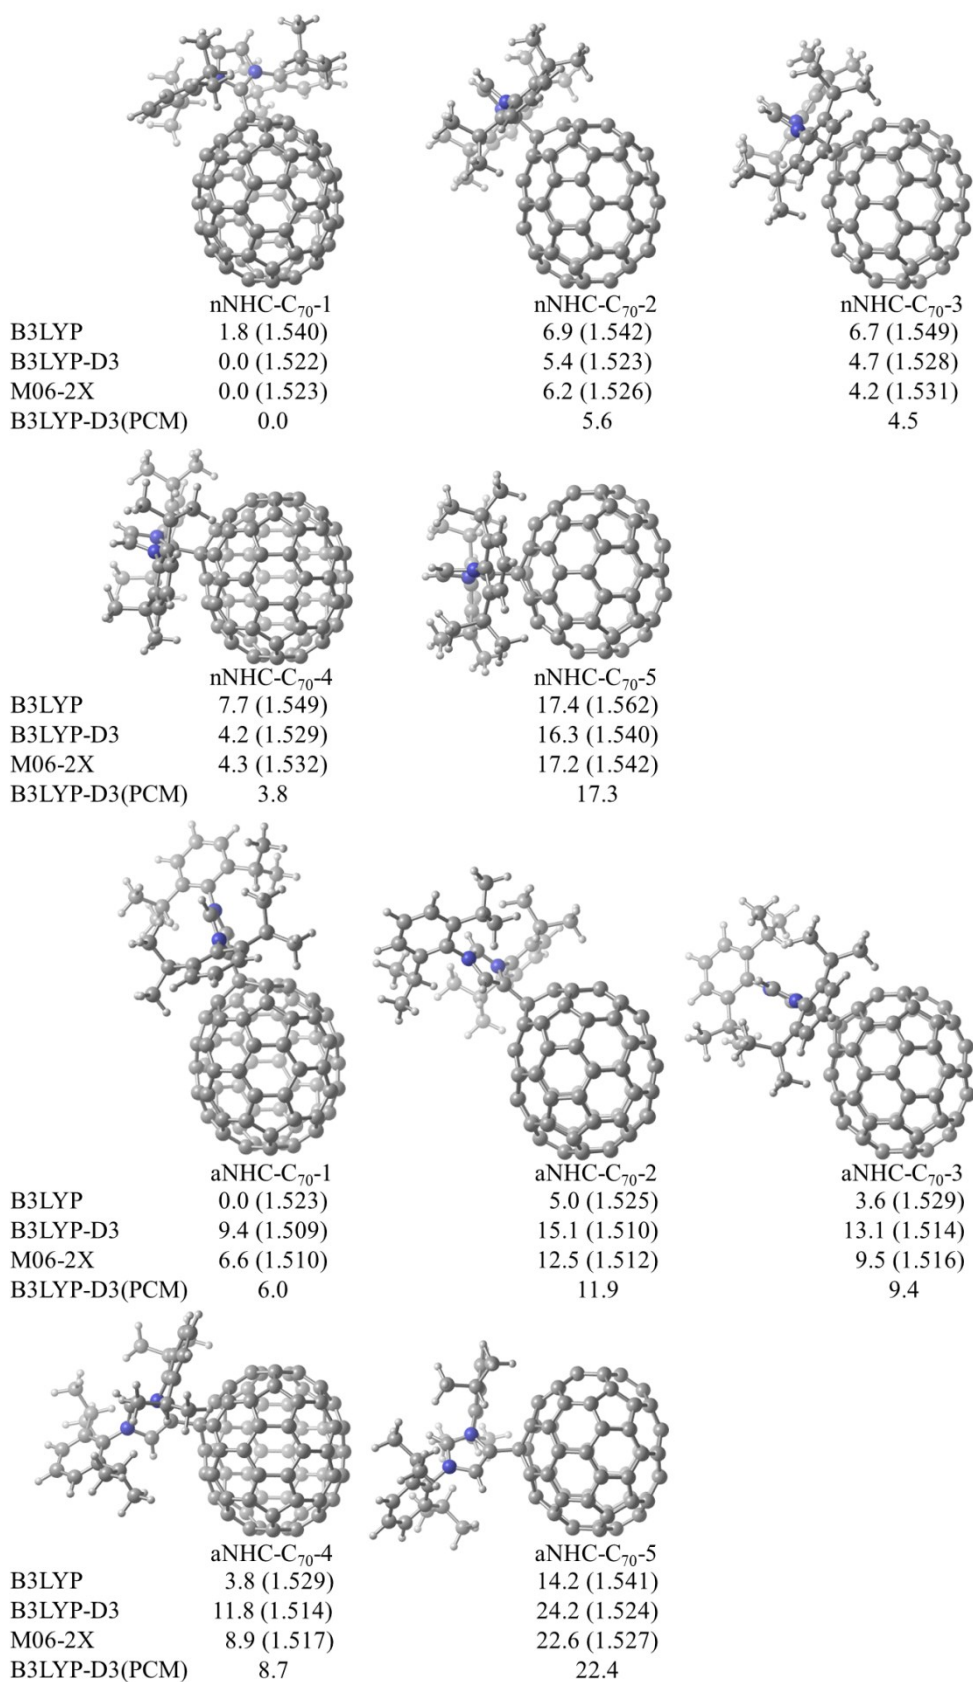

**Fig. S3** Optimized geometries (B3LYP-D3/6-31G\* level) of the ten NHC-C<sub>70</sub> adducts with relative energies (kcal mol<sup>-1</sup>) and R<sub>CC</sub> distances (Å, in parentheses) obtained at different levels of theory.

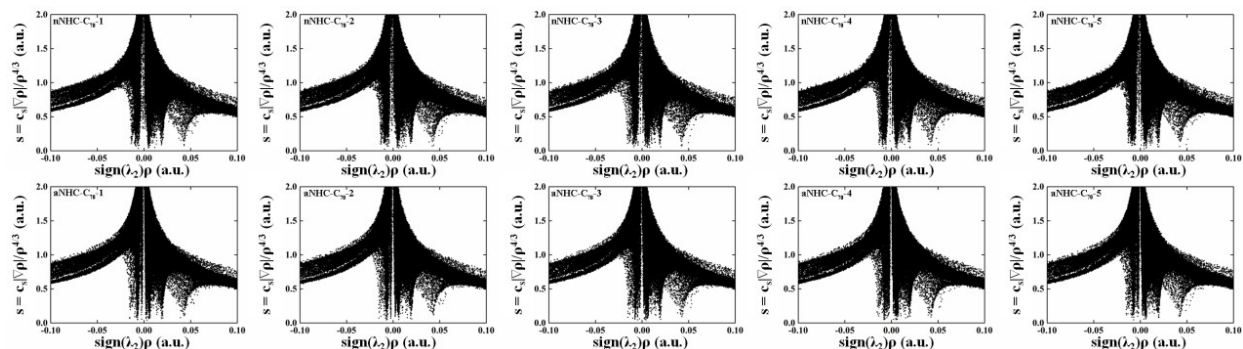

**Fig. S4** Plots of the RDG versus  $\text{sign}(\lambda_2)\rho$  value for the ten NHC- $C_{70}$  adducts.

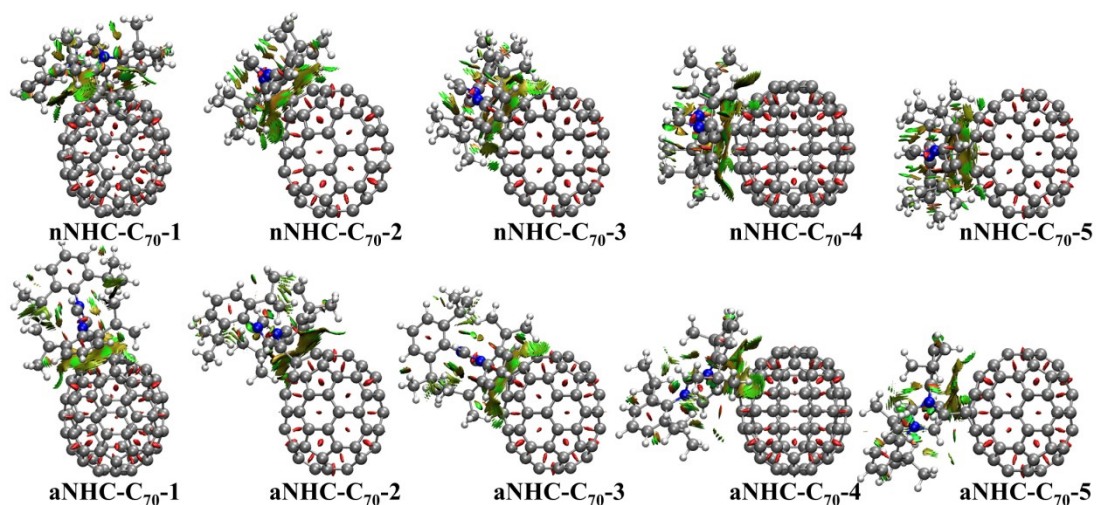

**Fig. S5** RDG isosurfaces ( $s = 0.5$  a.u.) for the ten NHC- $C_{70}$  adducts colored on a blue-green-red scale according to the  $\text{sign}(\lambda_2)\rho$  value (-0.04–0.02 a.u.).

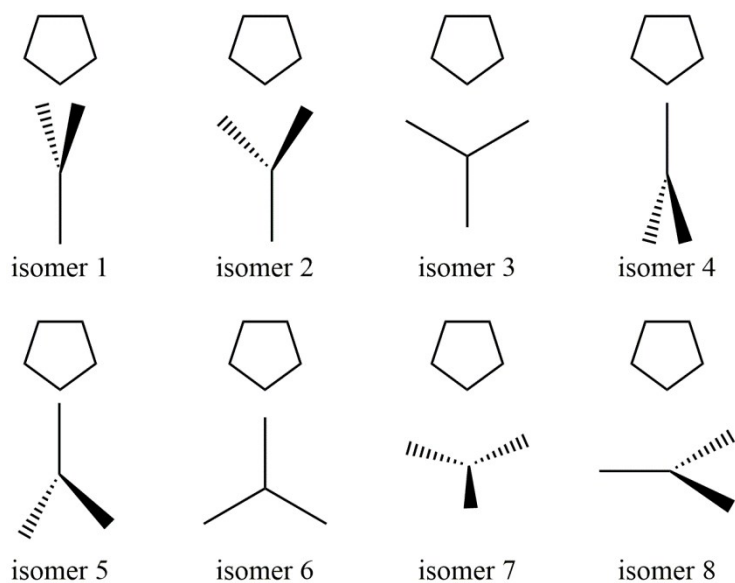

**Scheme S1.** Schematic representation of the relative orientations of the  $\text{Sc}_3\text{N}$  unit with respect to the N-heterocyclic rings of the normal or abnormal NHC groups.

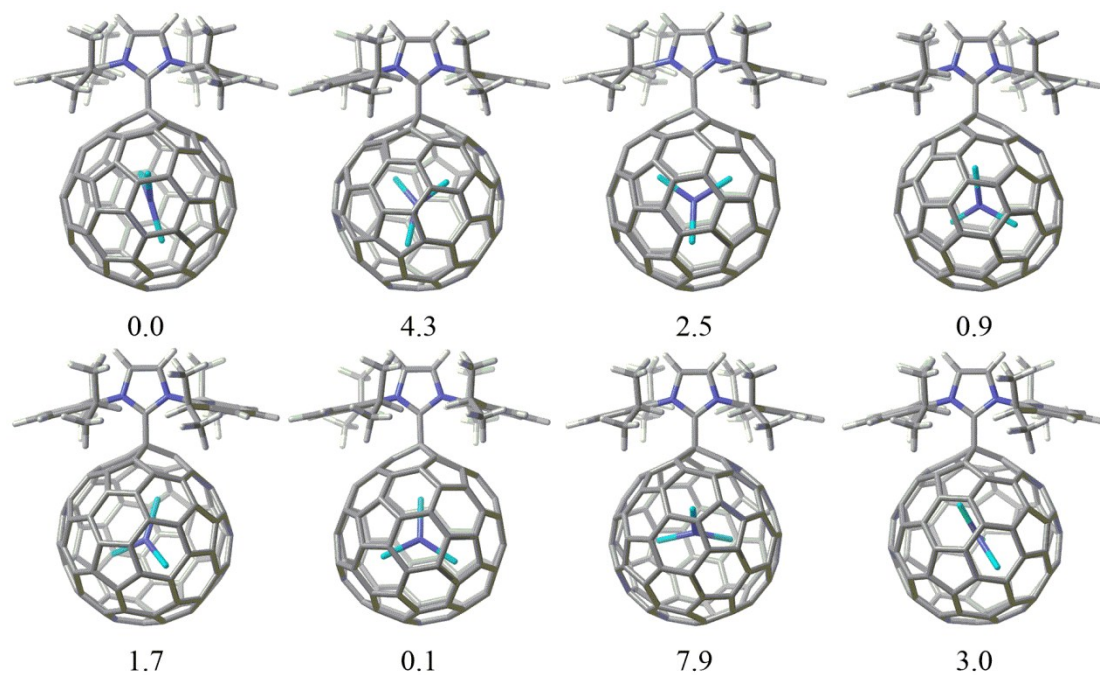

**Fig. S6** Optimized geometries (with relative energies in kcal mol<sup>-1</sup>) of different nNHC-Sc<sub>3</sub>N@C<sub>80</sub>-[6,6,6] adduct isomers (B3LYP-D3(PCM)/6-31G\*~LanL2DZ level).

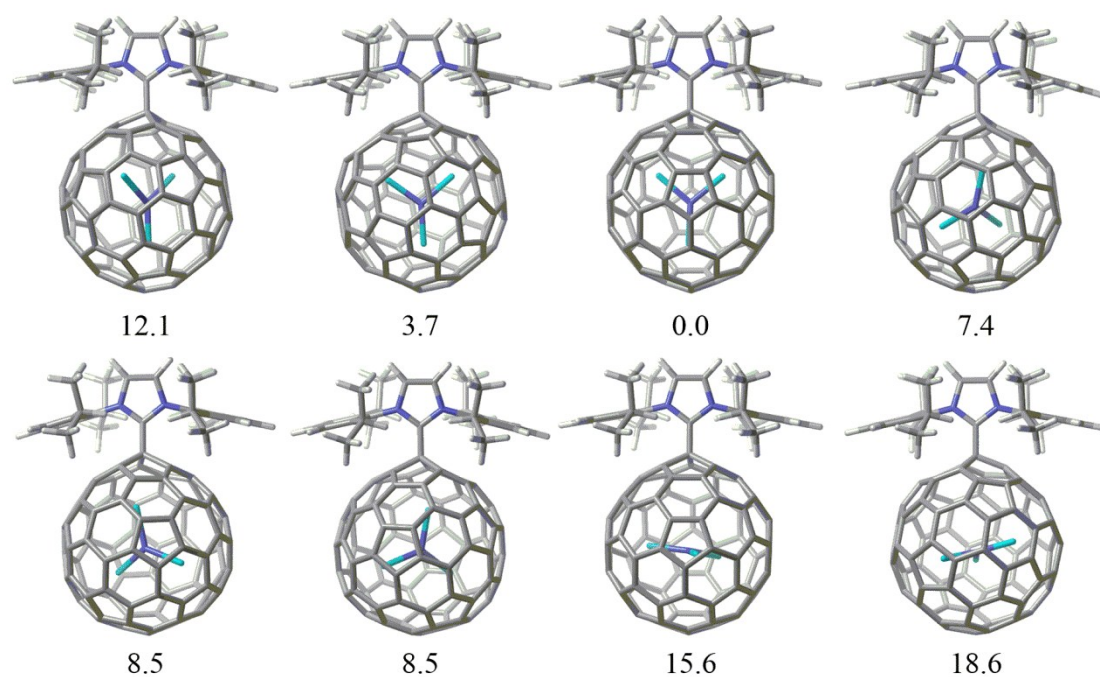

**Fig. S7** Optimized geometries (with relative energies in kcal mol<sup>-1</sup>) of different nNHC-Sc<sub>3</sub>N@C<sub>80</sub>-[5,6,6] adduct isomers (B3LYP-D3(PCM)/6-31G\*~LanL2DZ level).

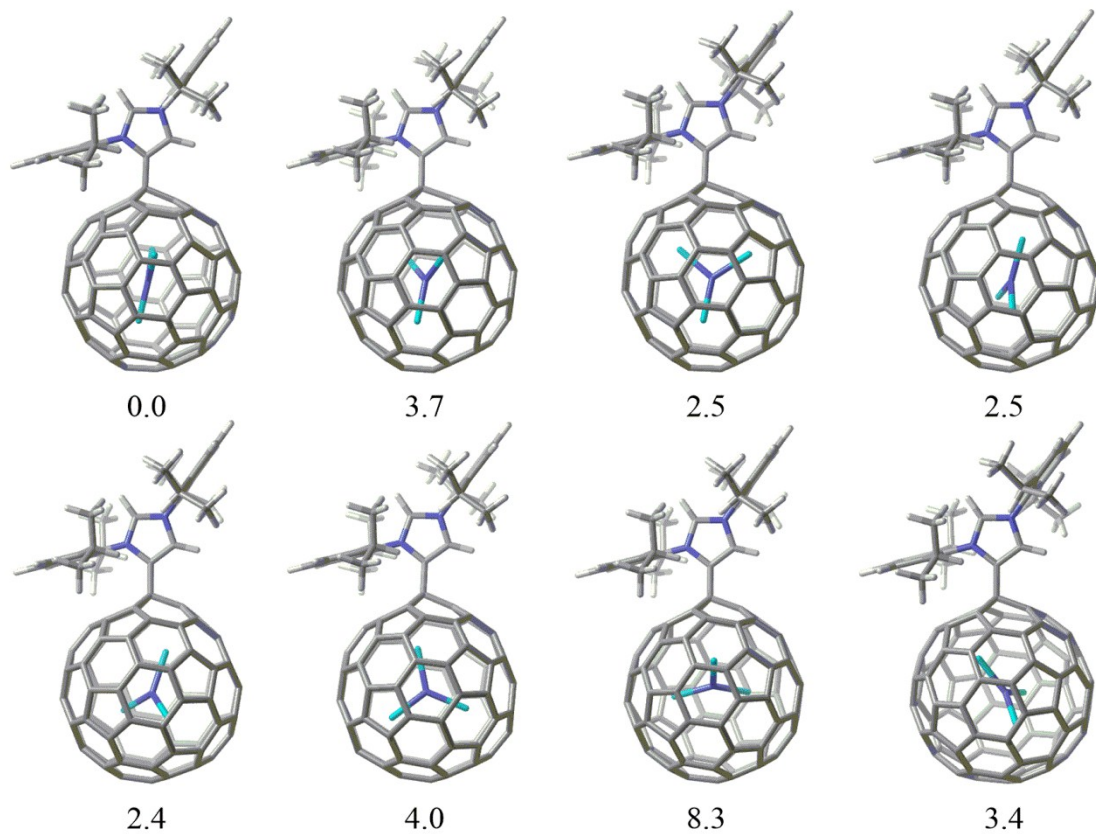

**Fig. S8** Optimized geometries (with relative energies in kcal mol<sup>-1</sup>) of different aNHC-Sc<sub>3</sub>N@C<sub>80</sub>-[6,6,6] adduct isomers (B3LYP-D3(PCM)/6-31G\*~LanL2DZ level).

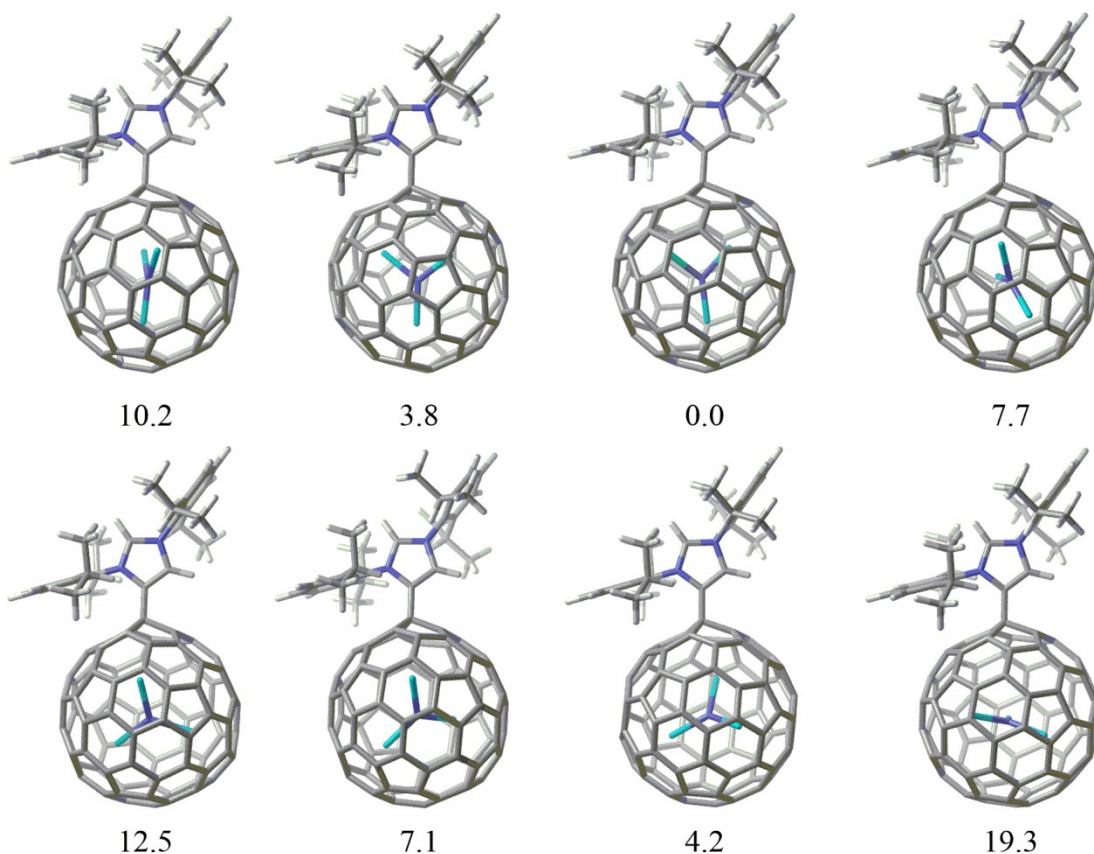

**Fig. S9** Optimized geometries (with relative energies in kcal mol<sup>-1</sup>) of different aNHC-Sc<sub>3</sub>N@C<sub>80</sub>-[5,6,6] adduct isomers (B3LYP-D3(PCM)/6-31G\*~LanL2DZ level).

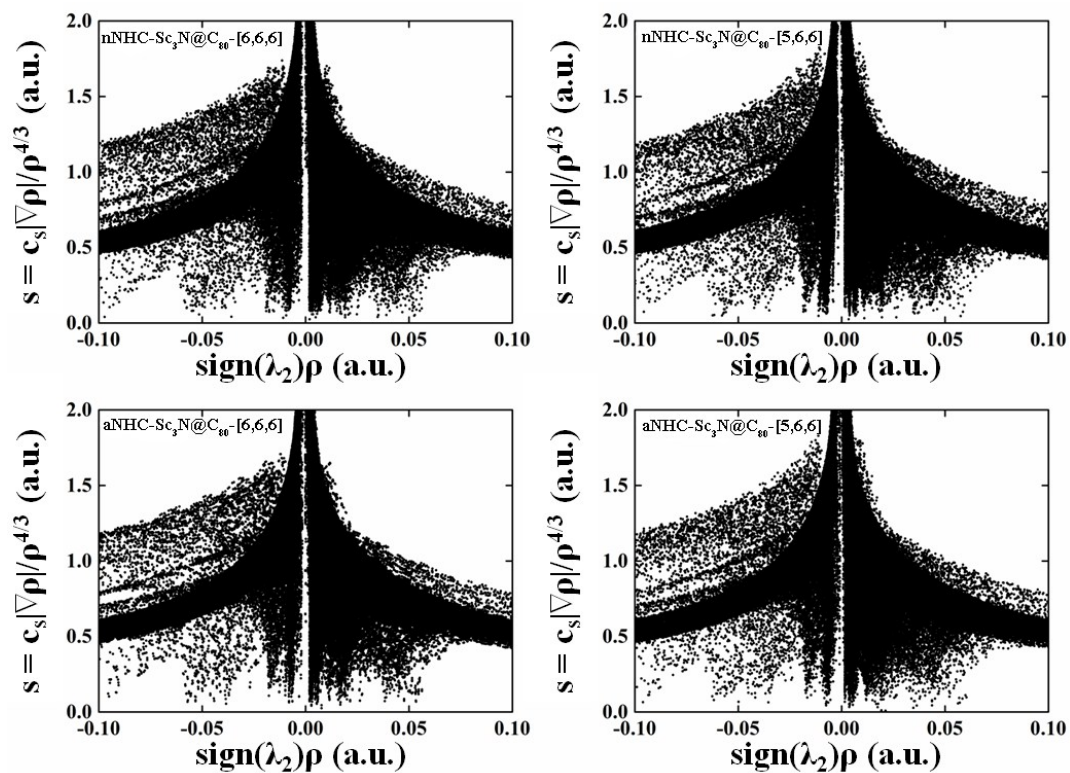

**Fig. S10** Plots of the RDG versus  $\text{sign}(\lambda_2)\rho$  value for the four NHC-Sc<sub>3</sub>N@C<sub>80</sub> adducts.

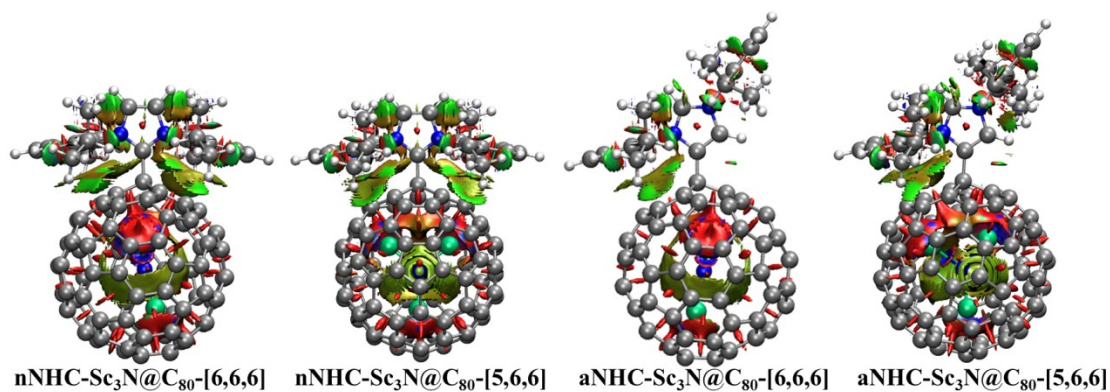

**Fig. S11** RDG isosurfaces ( $s = 0.5$  a.u.) for the four NHC-Sc<sub>3</sub>N@C<sub>80</sub> adducts colored on a blue-green-red scale according to the  $\text{sign}(\lambda_2)\rho$  value (-0.04–0.02 a.u.).

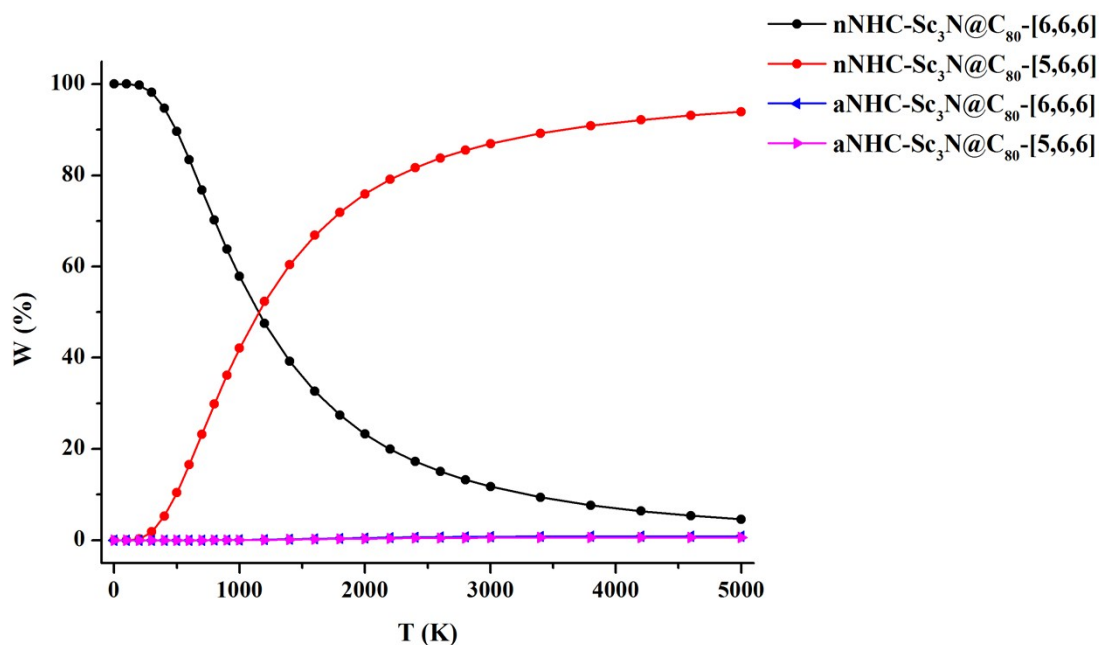

**Fig. S12** Relative concentrations of four NHC-Sc<sub>3</sub>N@C<sub>80</sub> isomers at different temperatures.



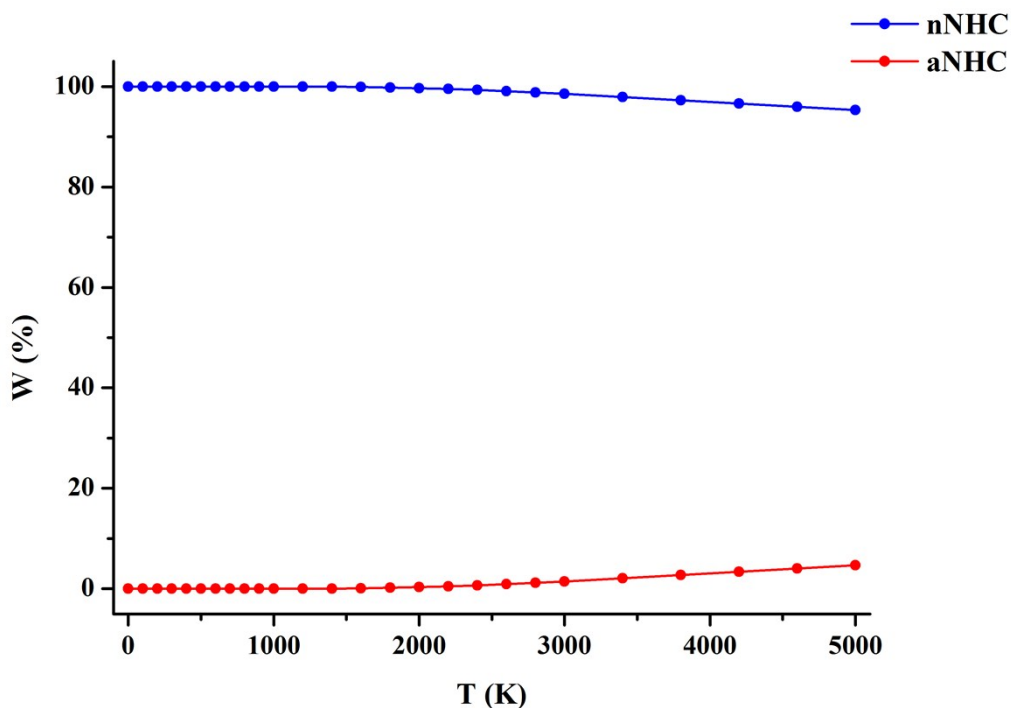

**Fig. S13** Relative concentrations of the nNHC and aNHC isomers at different temperatures.

**Cartesian coordinates of the NHC-C<sub>60/70</sub> and the low-lying NHC-Sc<sub>3</sub>N@C<sub>80</sub> adducts (B3LYP-D3/6-31G\*~LanL2DZ level)**

**nNHC-C<sub>60</sub>**

|   |             |             |             |
|---|-------------|-------------|-------------|
| N | 3.99137100  | 1.08034300  | 0.17576600  |
| C | 3.64783300  | 2.48247400  | 0.03851700  |
| C | 5.31435900  | 0.66282300  | 0.25911300  |
| H | 6.11843500  | 1.37753500  | 0.29338800  |
| C | 3.16971800  | 0.00081800  | 0.15136000  |
| C | 3.49954000  | 3.24739600  | 1.20752800  |
| C | 1.64860900  | 0.00441700  | 0.08590400  |
| C | 3.53184200  | 3.00667700  | -1.26085000 |
| C | 0.51421700  | 0.93743500  | -2.03180800 |
| C | 1.15499600  | -0.14881900 | -1.35706400 |
| C | 3.21263400  | 4.60425400  | 1.04363800  |
| H | 3.07127400  | 5.22995500  | 1.91754100  |
| C | 3.23749800  | 4.37054800  | -1.36190500 |
| H | 3.11666100  | 4.81685200  | -2.34184300 |
| C | -5.53784500 | 0.15079600  | 1.27729300  |
| C | 1.03683600  | 1.27746200  | 0.74396400  |
| C | -5.76843500 | 0.00490900  | -0.09258400 |
| C | 3.63433800  | 2.63662400  | 2.59477100  |

|   |             |            |             |
|---|-------------|------------|-------------|
| H | 3.38798800  | 1.57187400 | 2.51734000  |
| C | 3.07790300  | 5.15813400 | -0.22655400 |
| H | 2.83955100  | 6.21243000 | -0.33204000 |
| C | -5.45405500 | 1.08991100 | -1.00818700 |
| C | 0.24074700  | 2.18239500 | -1.44053700 |
| C | 3.73752500  | 2.15356000 | -2.50751200 |
| H | 3.36261200  | 1.14797300 | -2.28978700 |
| C | -4.94280500 | 0.50535400 | -2.23912600 |
| C | 0.45714600  | 2.29239300 | 0.00517900  |
| C | 2.95414700  | 2.66047700 | -3.72714000 |
| H | 1.90770000  | 2.84787700 | -3.47958200 |
| H | 2.98741200  | 1.90552900 | -4.51940500 |
| H | 3.39045200  | 3.57979800 | -4.13513300 |
| C | -0.41716800 | 0.40134200 | -3.02735300 |
| C | 2.66237100  | 3.25110400 | 3.61312100  |
| H | 2.94877000  | 4.27548800 | 3.87610700  |
| H | 2.67585400  | 2.66267200 | 4.53649500  |
| H | 1.63786100  | 3.26394600 | 3.23526000  |
| C | -3.82633500 | 2.93451800 | -1.24501200 |
| C | -4.90127000 | 2.27524400 | -0.52192300 |
| C | -4.04749700 | 1.04784900 | 2.86202400  |
| C | -0.54199600 | 1.71085200 | 2.59998000  |
| C | 0.48237900  | 0.94515700 | 2.02821800  |
| C | -2.83181200 | 0.33392900 | -3.50090600 |
| C | -3.41332100 | 3.16580100 | 1.06448400  |
| C | -0.61499300 | 3.08897200 | 0.56906500  |
| C | -1.62458900 | 1.05890000 | 3.32900300  |
| C | -1.59454300 | 1.08230200 | -3.33775200 |
| C | -2.89930300 | 3.47356400 | -0.26542200 |
| C | -4.65404800 | 2.42846900 | 0.90604700  |
| C | -3.32726600 | 2.36762100 | -2.42226800 |
| C | -3.90679100 | 1.13015200 | -2.93131600 |
| C | 5.08213300  | 2.75376100 | 3.10903000  |
| H | 5.79543400  | 2.24766400 | 2.45125500  |
| H | 5.16968000  | 2.30774900 | 4.10604100  |
| H | 5.38004200  | 3.80595600 | 3.18014300  |
| C | -1.10479900 | 2.80806600 | 1.84873100  |
| C | -4.96291300 | 1.38656100 | 1.78383100  |
| C | -2.85797200 | 1.76229700 | 3.01758200  |
| C | -1.00241600 | 2.85179200 | -1.73828800 |
| C | 5.23271100  | 2.04717500 | -2.86752300 |
| H | 5.36012400  | 1.42858100 | -3.76308900 |
| H | 5.82584200  | 1.59724600 | -2.06707600 |
| H | 5.64679100  | 3.03973200 | -3.07878700 |

|   |             |             |             |
|---|-------------|-------------|-------------|
| C | -1.52480200 | 3.43277600  | -0.50411500 |
| C | -2.53594600 | 2.84787200  | 2.10247700  |
| C | -1.90300800 | 2.34342900  | -2.68959400 |
| N | 3.97654500  | -1.08983300 | 0.18675300  |
| C | 3.61652400  | -2.48869000 | 0.05770300  |
| C | 5.30453500  | -0.69031400 | 0.26724300  |
| H | 6.09795900  | -1.41638700 | 0.31304300  |
| C | 3.43633800  | -3.23978200 | 1.23046200  |
| C | 3.53333300  | -3.02867600 | -1.23733600 |
| C | 0.50655600  | -1.35130000 | -1.78664500 |
| C | 3.15408800  | -4.59881200 | 1.07558400  |
| H | 2.99106500  | -5.21356000 | 1.95372800  |
| C | 3.24420900  | -4.39425100 | -1.33085000 |
| H | 3.15259400  | -4.85232200 | -2.30876400 |
| C | 1.03127700  | -1.09916500 | 0.99851100  |
| C | 3.54320900  | -2.61374300 | 2.61259200  |
| H | 3.34014800  | -1.54261700 | 2.51140200  |
| C | 3.05638300  | -5.16867500 | -0.19096200 |
| H | 2.82424400  | -6.22500600 | -0.28999200 |
| C | -5.46033000 | -1.25077700 | -0.75776400 |
| C | 0.22836100  | -2.44182300 | -0.94799500 |
| C | 3.78258200  | -2.19229500 | -2.48612400 |
| H | 3.45911500  | -1.16948300 | -2.27008700 |
| C | -4.94716600 | -0.94258700 | -2.08440200 |
| C | 0.44738300  | -2.24469600 | 0.48958000  |
| C | 2.97001500  | -2.66114200 | -3.70148100 |
| H | 1.91341100  | -2.78011200 | -3.45437900 |
| H | 3.05026600  | -1.91814500 | -4.50179400 |
| H | 3.34621200  | -3.61043000 | -4.09999300 |
| C | -0.42246200 | -1.03181300 | -2.87298200 |
| C | 2.50855800  | -3.17476600 | 3.59926900  |
| H | 2.74752300  | -4.20325500 | 3.89216500  |
| H | 2.50078800  | -2.56940900 | 4.51146100  |
| H | 1.50203500  | -3.16478700 | 3.17588000  |
| C | -3.84317100 | -3.11350800 | -0.59906500 |
| C | -4.91383800 | -2.30952100 | -0.03209200 |
| C | -4.05127800 | -0.39897400 | 3.01674200  |
| C | -0.54907800 | -1.12159800 | 2.90397800  |
| C | 0.47982900  | -0.50034500 | 2.18463000  |
| C | -2.83612500 | -1.05366600 | -3.35303800 |
| C | -3.42956400 | -2.85206800 | 1.70723400  |
| C | -0.63148800 | -2.89616000 | 1.20808300  |
| C | -1.62806000 | -0.32444700 | 3.47731000  |
| C | -1.60304500 | -1.75704100 | -3.03442500 |

|                            |             |             |             |
|----------------------------|-------------|-------------|-------------|
| C                          | -2.91807700 | -3.43717500 | 0.47298200  |
| C                          | -4.66582200 | -2.15804200 | 1.39557600  |
| C                          | -3.34203900 | -2.81053600 | -1.86933500 |
| C                          | -3.91584300 | -1.70586600 | -2.62896800 |
| C                          | 4.96739900  | -2.77539700 | 3.17684100  |
| H                          | 5.71867000  | -2.30599400 | 2.53330300  |
| H                          | 5.03909600  | -2.31584700 | 4.16898600  |
| H                          | 5.22551900  | -3.83598000 | 3.27411000  |
| C                          | -1.11913900 | -2.34850600 | 2.39884100  |
| C                          | -4.96877900 | -0.95296800 | 2.03373700  |
| C                          | -2.86550800 | -1.07117400 | 3.32110200  |
| C                          | -1.01892100 | -3.15151000 | -1.09708800 |
| C                          | 5.28152000  | -2.16615000 | -2.84328800 |
| H                          | 5.44555900  | -1.54975500 | -3.73443100 |
| H                          | 5.89497900  | -1.75440500 | -2.03698900 |
| H                          | 5.64287400  | -3.17816800 | -3.05906400 |
| C                          | -1.54361300 | -3.45517700 | 0.23166400  |
| C                          | -2.54988400 | -2.32712000 | 2.65540900  |
| C                          | -1.91741600 | -2.85041800 | -2.13452700 |
| <b>aNHC-C<sub>60</sub></b> |             |             |             |
| N                          | 4.78450600  | -0.65645300 | 0.01115000  |
| C                          | 5.99444200  | -1.43995700 | 0.00973300  |
| C                          | 3.48825400  | -1.15366000 | 0.03959100  |
| H                          | 3.28507500  | -2.21083100 | 0.05876500  |
| C                          | 4.72802100  | 0.67735000  | -0.01771700 |
| C                          | 6.56269400  | -1.77678400 | 1.24836900  |
| C                          | 1.11939200  | -0.08728400 | 0.00535300  |
| C                          | 6.51924200  | -1.83905900 | -1.22928700 |
| C                          | -0.16849700 | 1.74104100  | -1.26982200 |
| C                          | 0.55367500  | 0.50944800  | -1.28340000 |
| C                          | 7.72348900  | -2.55633500 | 1.21810600  |
| H                          | 8.19611900  | -2.84454600 | 2.15164600  |
| C                          | 7.68171900  | -2.61648400 | -1.20039800 |
| H                          | 8.12258900  | -2.94992800 | -2.13448400 |
| C                          | -5.97533500 | -1.09999900 | 1.24573100  |
| C                          | 0.49617400  | 0.60322300  | 1.25358800  |
| C                          | -6.27381400 | -0.51672800 | 0.01171300  |
| C                          | 5.94607900  | -1.34535900 | 2.57062900  |
| H                          | 5.10974400  | -0.67160700 | 2.35978700  |
| C                          | 8.27570300  | -2.97115900 | 0.00842700  |
| H                          | 9.17620100  | -3.57825200 | 0.00803100  |
| C                          | -6.06537900 | 0.90737400  | -0.19542700 |
| C                          | -0.46506300 | 2.46770800  | -0.10502300 |
| C                          | 5.86155900  | -1.46785900 | -2.54987400 |

|   |             |             |             |
|---|-------------|-------------|-------------|
| H | 5.00860500  | -0.81441800 | -2.34169600 |
| C | -5.59628500 | 1.09894000  | -1.56011200 |
| C | -0.16920000 | 1.81409200  | 1.17568500  |
| C | 6.82316900  | -0.68474500 | -3.45851700 |
| H | 7.19633400  | 0.21657700  | -2.96059900 |
| H | 6.30888000  | -0.37893700 | -4.37569700 |
| H | 7.68816100  | -1.29164200 | -3.74763200 |
| C | -1.12357900 | 1.74824300  | -2.38094400 |
| C | 6.94698700  | -0.56578400 | 3.43846900  |
| H | 7.79936800  | -1.18854700 | 3.73095100  |
| H | 6.45893300  | -0.21889500 | 4.35540500  |
| H | 7.33649200  | 0.30947700  | 2.90765200  |
| C | -4.54653300 | 2.71083100  | 0.54701300  |
| C | -5.54515900 | 1.69376900  | 0.83316400  |
| C | -4.44380200 | -1.07029300 | 3.03212600  |
| C | -0.99412100 | -0.12094900 | 3.09299600  |
| C | 0.03257500  | -0.39498500 | 2.18039100  |
| C | -3.55367600 | 1.77094600  | -2.76662200 |
| C | -4.01587500 | 1.71528900  | 2.61739800  |
| C | -1.24940000 | 2.11317700  | 2.09961200  |
| C | -2.00204500 | -1.13570000 | 3.38532500  |
| C | -2.34761100 | 2.40575700  | -2.25714200 |
| C | -3.59316300 | 2.71424800  | 1.64279200  |
| C | -5.22577300 | 1.08702500  | 2.11895400  |
| C | -4.08614600 | 2.88691000  | -0.76257900 |
| C | -4.63303200 | 2.06730900  | -1.83809300 |
| C | 5.37079600  | -2.55724200 | 3.32437600  |
| H | 4.62318500  | -3.08094800 | 2.71958100  |
| H | 4.89053800  | -2.23363200 | 4.25390300  |
| H | 6.15833400  | -3.27432000 | 3.58148000  |
| C | -1.65246600 | 1.16345200  | 3.04527400  |
| C | -5.43342100 | -0.28013000 | 2.31709400  |
| C | -3.28410100 | -0.46339000 | 3.51837300  |
| C | -1.75265900 | 3.10037900  | 0.02489400  |
| C | 5.30883200  | -2.71723100 | -3.25730100 |
| H | 4.79745500  | -2.43350300 | -4.18307300 |
| H | 4.59156100  | -3.24656800 | -2.62161800 |
| H | 6.11191600  | -3.41678800 | -3.51479500 |
| C | -2.23351300 | 2.90389600  | 1.39060500  |
| C | -3.06698400 | 0.96140600  | 3.31050400  |
| C | -2.68015200 | 3.10903200  | -1.03260900 |
| N | 3.44137500  | 1.05239500  | -0.01178200 |
| C | 3.02708400  | 2.44240700  | -0.02151800 |
| C | 2.62928000  | -0.08838500 | 0.02454900  |

|   |             |             |             |
|---|-------------|-------------|-------------|
| C | 2.83958200  | 3.07927800  | 1.21607100  |
| C | 2.85643000  | 3.07114800  | -1.26482800 |
| C | -0.03847100 | -0.32329200 | -2.28152100 |
| C | 2.45673400  | 4.42280800  | 1.17911100  |
| H | 2.28600400  | 4.95440500  | 2.10819700  |
| C | 2.47622500  | 4.41597900  | -1.24002700 |
| H | 2.31909100  | 4.94181800  | -2.17474000 |
| C | 0.61350600  | -1.54313800 | 0.20784200  |
| C | 3.08796500  | 2.35815500  | 2.53462400  |
| H | 2.88356500  | 1.29383600  | 2.37644600  |
| C | 2.27544600  | 5.08120900  | -0.03409100 |
| H | 1.96555200  | 6.12201800  | -0.03938100 |
| C | -5.94239400 | -1.20647100 | -1.22430600 |
| C | -0.21540400 | -1.71254800 | -2.14219500 |
| C | 3.11221000  | 2.33961700  | -2.57530700 |
| H | 2.90006800  | 1.27899700  | -2.40631600 |
| C | -5.51922100 | -0.20897200 | -2.19617600 |
| C | 0.07401300  | -2.29219800 | -0.82285100 |
| C | 4.58594500  | 2.48939800  | -3.00088600 |
| H | 5.27988800  | 2.10939400  | -2.24309800 |
| H | 4.77288200  | 1.93918300  | -3.92990100 |
| H | 4.83290400  | 3.54289100  | -3.17498700 |
| C | -1.04523600 | 0.45389900  | -3.01265400 |
| C | 4.56188400  | 2.50713400  | 2.96120100  |
| H | 4.80967500  | 3.56140100  | 3.12816900  |
| H | 4.74723600  | 1.96286300  | 3.89409900  |
| H | 5.25451200  | 2.12100900  | 2.20547900  |
| C | -4.22844200 | -2.75179700 | -2.11073200 |
| C | -5.30464200 | -2.44709000 | -1.18233000 |
| C | -4.36856800 | -2.37705600 | 2.39654200  |
| C | -0.84724500 | -2.68215600 | 1.84505300  |
| C | 0.10532600  | -1.70224800 | 1.54348700  |
| C | -3.47943000 | 0.51733500  | -3.37513100 |
| C | -3.70064000 | -3.71796200 | -0.02732500 |
| C | -0.93407100 | -3.29823100 | -0.53370300 |
| C | -1.93036000 | -2.38512600 | 2.77673500  |
| C | -2.19651500 | -0.15881700 | -3.50536100 |
| C | -3.23023600 | -3.52460800 | -1.39370400 |
| C | -4.98593800 | -3.05516900 | 0.10314700  |
| C | -3.81253800 | -1.78857400 | -3.03646600 |
| C | -4.48221700 | -0.49390500 | -3.08316200 |
| C | 2.16300000  | 2.82179000  | 3.66812800  |
| H | 1.11377500  | 2.78417500  | 3.36744900  |
| H | 2.29334300  | 2.16911100  | 4.53763200  |

|   |             |             |             |
|---|-------------|-------------|-------------|
| H | 2.39633200  | 3.84291900  | 3.99004200  |
| C | -1.38226400 | -3.49399000 | 0.77701200  |
| C | -5.31116700 | -2.39254800 | 1.28911300  |
| C | -3.13609700 | -3.02118700 | 2.27240100  |
| C | -1.43541500 | -2.31942700 | -2.61284500 |
| C | 2.18770500  | 2.79391700  | -3.71302400 |
| H | 2.31321900  | 2.12914100  | -4.57397300 |
| H | 1.13917900  | 2.76209200  | -3.40980900 |
| H | 2.42437300  | 3.81014900  | -4.04859500 |
| C | -1.87127200 | -3.31490000 | -1.63608300 |
| C | -2.79593800 | -3.71039500 | 1.03555900  |
| C | -2.40605500 | -1.58188000 | -3.31422900 |
| H | 5.57628700  | 1.33990100  | -0.03911600 |

**nNHC-C<sub>70</sub>-1**

|   |             |             |             |
|---|-------------|-------------|-------------|
| C | -3.79549700 | 0.03172200  | -0.00798900 |
| C | -5.91200600 | 0.78179900  | 0.03346800  |
| H | -6.68660200 | 1.52926600  | 0.03616800  |
| C | -5.95832800 | -0.57053300 | 0.06709900  |
| H | -6.78189000 | -1.26203700 | 0.11054700  |
| C | -4.15536100 | 2.53153500  | 0.05986000  |
| C | -3.95642100 | 3.10195600  | 1.32877200  |
| C | -3.59987600 | 4.45391200  | 1.36125200  |
| H | -3.41994200 | 4.93311000  | 2.31662100  |
| C | -3.45789500 | 5.18718800  | 0.18746600  |
| H | -3.16928300 | 6.23295800  | 0.23752400  |
| C | -3.67663700 | 4.59010600  | -1.05093300 |
| H | -3.55438100 | 5.17337700  | -1.95665200 |
| C | -4.03280300 | 3.24262300  | -1.14487200 |
| C | -4.16077500 | 2.31193500  | 2.61503600  |
| H | -3.92304600 | 1.26522800  | 2.40216800  |
| C | -3.22979800 | 2.75194400  | 3.75364700  |
| H | -3.50597300 | 3.73747700  | 4.14544800  |
| H | -2.18765900 | 2.78473600  | 3.42998000  |
| H | -3.30571300 | 2.04006500  | 4.58222100  |
| C | -5.62749700 | 2.39517300  | 3.08085600  |
| H | -5.90255300 | 3.43293700  | 3.30130300  |
| H | -5.76780500 | 1.80538000  | 3.99378900  |
| H | -6.32472900 | 2.01575500  | 2.32837100  |
| C | -4.29873600 | 2.59188100  | -2.49423600 |
| H | -4.14407200 | 1.51385800  | -2.38167400 |
| C | -3.33846500 | 3.06919600  | -3.59310000 |
| H | -3.53117100 | 4.11080800  | -3.87339200 |
| H | -3.47525800 | 2.45959400  | -4.49221500 |

|   |             |             |             |
|---|-------------|-------------|-------------|
| H | -2.29573700 | 2.98631100  | -3.28023800 |
| C | -5.76066200 | 2.82074000  | -2.92304800 |
| H | -6.47005500 | 2.41477500  | -2.19443800 |
| H | -5.95545100 | 2.33947200  | -3.88793800 |
| H | -5.96695800 | 3.89171300  | -3.02931200 |
| C | -4.31545800 | -2.43017600 | 0.17066600  |
| C | -4.09189100 | -2.94312200 | 1.46045700  |
| C | -3.78451900 | -4.30446900 | 1.54730800  |
| H | -3.58221100 | -4.74331900 | 2.51704100  |
| C | -3.71062100 | -5.09903700 | 0.40724700  |
| H | -3.45620300 | -6.15069700 | 0.50027000  |
| C | -3.95274600 | -4.55648200 | -0.85158200 |
| H | -3.87990800 | -5.18851900 | -1.72913600 |
| C | -4.26180000 | -3.20250000 | -1.00189800 |
| C | -4.18822400 | -2.07580800 | 2.71091500  |
| H | -3.81787700 | -1.07682600 | 2.45561800  |
| C | -3.32312800 | -2.58303700 | 3.87373500  |
| H | -3.73595900 | -3.49742200 | 4.31559200  |
| H | -3.29570900 | -1.82437900 | 4.66270300  |
| H | -2.29720000 | -2.77724800 | 3.55474100  |
| C | -5.64993400 | -1.94264100 | 3.18262100  |
| H | -6.29566800 | -1.49240500 | 2.42437800  |
| H | -5.69998800 | -1.31341600 | 4.07844700  |
| H | -6.06032800 | -2.92685000 | 3.43574400  |
| C | -4.52612400 | -2.60298000 | -2.37619100 |
| H | -4.25024200 | -1.54287500 | -2.33667700 |
| C | -3.68378600 | -3.24749100 | -3.48683900 |
| H | -2.62267600 | -3.26503200 | -3.22918000 |
| H | -3.79881900 | -2.67442800 | -4.41286500 |
| H | -4.00981600 | -4.27225400 | -3.69715400 |
| C | -6.02213300 | -2.69507000 | -2.73479700 |
| H | -6.34480800 | -3.74197300 | -2.76037100 |
| H | -6.20382600 | -2.25911800 | -3.72340500 |
| H | -6.65419200 | -2.16737900 | -2.01454600 |
| C | -2.27526500 | -0.00793200 | -0.06359300 |
| C | -0.02681800 | 2.65525900  | -1.69991200 |
| C | 5.42086600  | 0.14497400  | -2.25919000 |
| C | 1.24336400  | -0.71852200 | 3.28202800  |
| C | 1.51438300  | 3.07656600  | 1.53342400  |
| C | -0.28360000 | 0.70584600  | -3.15773500 |
| C | 4.99840800  | -2.73185500 | -0.22691800 |
| C | -0.29405300 | -2.05899000 | -2.49300800 |
| C | 2.00649600  | 0.55442000  | -3.70686500 |
| C | 0.32903200  | -3.03987100 | -1.64688400 |



|   |             |             |             |
|---|-------------|-------------|-------------|
| C | 0.54309400  | 3.19155100  | 0.49363000  |
| C | -1.07006200 | 2.13585100  | -0.83862600 |
| C | 3.26994000  | 3.48798100  | -0.19036200 |
| C | -0.96331200 | -0.67927600 | 2.05365600  |
| C | 5.41435100  | -1.20528300 | -1.93638600 |
| C | 5.88248900  | -0.83086700 | 1.70125500  |
| C | -0.71787700 | 2.49556200  | 0.53041400  |
| C | 0.51540400  | -2.63225500 | 1.88619200  |
| C | 4.59888200  | -2.85280600 | 1.09903400  |
| C | 0.96198300  | 3.31219000  | -0.88126400 |
| C | -1.27160700 | 0.20069200  | -2.29466700 |
| C | 2.72075300  | -3.42345900 | -1.00854700 |
| C | 2.85833000  | 3.35720500  | 1.18413000  |
| C | 4.03883300  | -2.97463800 | -1.28794500 |
| C | 5.07530600  | 2.57516400  | 1.01555700  |
| C | -1.27395600 | -1.20771800 | -1.95320200 |
| C | 5.05439700  | -1.88786900 | 2.08304800  |
| C | 0.05762600  | -0.04444800 | 2.88482400  |
| C | -0.94899600 | 1.53830400  | 1.52057300  |
| C | 2.30302000  | -3.55083600 | 0.39712500  |
| C | 3.25312600  | -0.09814600 | -3.49291200 |
| C | 3.71527800  | -0.38281200 | 3.49396000  |
| C | 3.24669000  | -1.52808100 | -3.15178600 |
| C | 2.36063900  | 1.50554400  | 3.26366200  |
| C | 4.62727000  | 2.99537900  | -0.29931400 |
| C | 4.29773300  | -2.03828200 | -2.34679700 |
| C | 5.87537600  | 1.12073600  | -1.28885800 |
| C | 1.25787500  | 2.10948700  | 2.60547500  |
| C | 5.89362600  | 1.45307400  | 1.15527000  |
| C | 2.83030700  | -2.48876800 | 2.58222900  |
| C | 6.30817500  | 0.70578700  | -0.02463600 |
| C | 0.93013500  | -3.36581100 | 0.71548700  |
| C | 5.63756500  | 0.50239500  | 2.22341300  |
| C | 6.30133500  | -0.70237200 | 0.31217000  |
| C | 0.35344000  | 1.95542400  | -2.84063300 |
| C | -0.73975900 | -1.98368700 | 1.60043600  |
| C | -1.08902500 | -2.27919900 | 0.21664700  |
| C | 0.75255800  | -0.17260400 | -3.67672600 |
| C | -0.05472600 | -3.14168400 | -0.31342900 |
| C | 4.31034700  | 0.71197200  | -3.00362600 |
| C | -1.65251700 | 0.31609700  | 1.30096600  |
| C | 4.57466800  | 0.71816400  | 3.10542800  |
| C | 3.96861500  | 2.79023400  | 1.92823600  |
| C | 1.73697500  | -3.12961700 | -1.99092900 |

|   |             |             |             |
|---|-------------|-------------|-------------|
| C | 1.48970600  | -2.06848200 | 2.76404900  |
| C | -1.72805600 | -1.36147900 | -0.60031500 |
| C | 2.35348100  | 0.10795100  | 3.59718300  |
| C | 1.99349700  | -2.19508500 | -3.05004300 |
| C | 2.33561800  | 3.32067000  | -1.24578600 |
| C | 5.02188900  | 2.28306400  | -1.42583900 |
| C | 3.94727400  | -1.65641100 | 2.99137600  |
| C | 5.86231200  | -1.64072700 | -0.62840600 |
| C | 0.74706000  | -1.52079200 | -3.35358000 |
| C | -1.71777500 | 0.95403300  | -1.15595700 |
| C | 3.23771800  | -3.23073100 | 1.41609600  |
| C | 3.72656700  | 1.88383900  | 2.95217500  |
| C | 4.06249900  | 2.02845300  | -2.48405700 |
| C | 0.06636900  | 1.33818100  | 2.55225600  |
| C | 2.74915400  | 2.56705400  | -2.44067200 |
| C | 1.76109800  | 1.86855300  | -3.18557100 |
| N | -4.57168500 | 1.14393600  | -0.00113000 |
| N | -4.64442000 | -1.02370600 | 0.05005000  |

**nNHC-C<sub>70</sub>-2**

|   |            |             |             |
|---|------------|-------------|-------------|
| C | 3.68625400 | 0.08506300  | 0.30202800  |
| C | 5.81126300 | -0.52235400 | 0.70355700  |
| H | 6.61491200 | -1.21501600 | 0.88504400  |
| C | 5.78380000 | 0.82764100  | 0.61110400  |
| H | 6.55841700 | 1.57056500  | 0.69053700  |
| C | 4.19264800 | -2.38514800 | 0.45781500  |
| C | 3.86211600 | -3.02930300 | 1.66178100  |
| C | 3.60203300 | -4.39985900 | 1.59578600  |
| H | 3.32523900 | -4.93454800 | 2.49739800  |
| C | 3.67241600 | -5.08345800 | 0.38474500  |
| H | 3.45412200 | -6.14687100 | 0.35337300  |
| C | 4.01334300 | -4.41461600 | -0.78586400 |
| H | 4.05617900 | -4.96119800 | -1.72075200 |
| C | 4.28659600 | -3.04254300 | -0.78012900 |
| C | 3.80165500 | -2.28011700 | 2.98493800  |
| H | 3.58222800 | -1.23032500 | 2.76421200  |
| C | 2.68479100 | -2.78483800 | 3.90954400  |
| H | 2.91436400 | -3.77632500 | 4.31567500  |
| H | 1.72654900 | -2.84223000 | 3.38944400  |
| H | 2.57218700 | -2.10324200 | 4.75888300  |
| C | 5.16128400 | -2.34139500 | 3.70662800  |
| H | 5.43095400 | -3.37970900 | 3.93029300  |
| H | 5.11652400 | -1.79045300 | 4.65278400  |
| H | 5.96600400 | -1.90910400 | 3.10342300  |

|   |             |             |             |
|---|-------------|-------------|-------------|
| C | 4.71258700  | -2.32163800 | -2.05270600 |
| H | 4.39065400  | -1.27898700 | -1.96854200 |
| C | 4.05363700  | -2.88556500 | -3.31950900 |
| H | 4.44489200  | -3.87739800 | -3.57300400 |
| H | 4.26771800  | -2.22559800 | -4.16660400 |
| H | 2.96962200  | -2.95534400 | -3.21078100 |
| C | 6.24559500  | -2.35070100 | -2.20765700 |
| H | 6.75806400  | -1.88164900 | -1.36284100 |
| H | 6.54365500  | -1.81726800 | -3.11734800 |
| H | 6.60381100  | -3.38351800 | -2.28632700 |
| C | 4.08685000  | 2.57364300  | 0.13134100  |
| C | 3.76735500  | 3.36111900  | 1.25065500  |
| C | 3.42523900  | 4.69342400  | 1.00839900  |
| H | 3.15341000  | 5.33482700  | 1.83878600  |
| C | 3.40162600  | 5.20066200  | -0.28790800 |
| H | 3.11620200  | 6.23486100  | -0.45635700 |
| C | 3.73232000  | 4.39209000  | -1.37090000 |
| H | 3.69505800  | 4.80241900  | -2.37293200 |
| C | 4.09015700  | 3.05220700  | -1.19066900 |
| C | 3.78165200  | 2.79744200  | 2.66509800  |
| H | 3.56288500  | 1.72560000  | 2.59835600  |
| C | 2.71068800  | 3.42141300  | 3.57200000  |
| H | 2.95763000  | 4.45654400  | 3.83306100  |
| H | 2.64729300  | 2.85670600  | 4.50796800  |
| H | 1.72549600  | 3.40818000  | 3.10153700  |
| C | 5.17083000  | 2.96317900  | 3.31154800  |
| H | 5.95555800  | 2.45408100  | 2.74471100  |
| H | 5.16911800  | 2.55070800  | 4.32660400  |
| H | 5.43760800  | 4.02410700  | 3.37634200  |
| C | 4.46993700  | 2.16932600  | -2.37447400 |
| H | 4.09654600  | 1.15928800  | -2.17071600 |
| C | 3.83441200  | 2.61881200  | -3.69807000 |
| H | 2.75868400  | 2.77300400  | -3.59403600 |
| H | 3.99443400  | 1.84674200  | -4.45766800 |
| H | 4.29071100  | 3.54301700  | -4.07177800 |
| C | 6.00039800  | 2.09416900  | -2.54604900 |
| H | 6.41328200  | 3.09175900  | -2.73488400 |
| H | 6.25076900  | 1.45639300  | -3.40126800 |
| H | 6.50229700  | 1.68158000  | -1.66729200 |
| C | 1.89574400  | -0.35845400 | -1.42014200 |
| C | -0.27765900 | -3.33761500 | -0.95762600 |
| C | -5.85336900 | -0.98370600 | -0.94109700 |
| C | -0.31173200 | 2.03148300  | 2.05148500  |
| C | -0.78811800 | -2.09432900 | 2.40119400  |

|   |             |             |             |
|---|-------------|-------------|-------------|
| C | -0.64234400 | -2.28739200 | -3.13370700 |
| C | -5.07417500 | 2.46377200  | -0.68204200 |
| C | -0.65309000 | 0.46813500  | -3.84908900 |
| C | -2.99250200 | -2.24795000 | -2.97868900 |
| C | -1.06694600 | 1.77939100  | -3.42146500 |
| C | -0.17813000 | -2.73671200 | 1.29397600  |
| C | 0.93716400  | -2.58183300 | -0.78088400 |
| C | -2.92553900 | -3.13341700 | 1.67527600  |
| C | 1.46341300  | 1.34164300  | 0.41992600  |
| C | -5.85906900 | 0.35822500  | -1.29048400 |
| C | -5.20373400 | 1.73385100  | 2.06776300  |
| C | 0.97073700  | -2.16789200 | 0.61818300  |
| C | -0.20193500 | 3.02442900  | -0.20454300 |
| C | -4.31983400 | 3.15722600  | 0.25442600  |
| C | -0.95006500 | -3.45540900 | 0.32516800  |
| C | 0.51051500  | -1.50601100 | -2.96152900 |
| C | -3.19515000 | 2.56811500  | -2.33987100 |
| C | -2.14838100 | -2.42221500 | 2.64994700  |
| C | -4.49609100 | 2.12652900  | -1.97127200 |
| C | -4.36750400 | -1.65786400 | 2.81369500  |
| C | 0.50653600  | -0.12042300 | -3.32284900 |
| C | -4.38677200 | 2.78944400  | 1.65638800  |
| C | 0.76313000  | 1.17950300  | 1.66330000  |
| C | 1.47433000  | -0.95143500 | 1.01820400  |
| C | -2.39314000 | 3.29108800  | -1.34307700 |
| C | -4.16413900 | -1.48575100 | -2.72806300 |
| C | -2.57161600 | 2.01099600  | 3.12694200  |
| C | -4.16996100 | -0.06112500 | -3.09859900 |
| C | -1.20340100 | 0.13906600  | 3.39295000  |
| C | -4.29517300 | -2.66241000 | 1.76920500  |
| C | -4.98160200 | 0.83278800  | -2.34950800 |
| C | -5.92162600 | -1.36946300 | 0.45344400  |
| C | -0.29799800 | -0.77161300 | 2.78369300  |
| C | -5.19333700 | -0.54203200 | 2.65912600  |
| C | -2.17296200 | 3.39429300  | 1.13607700  |
| C | -5.98987100 | -0.39428800 | 1.45391900  |
| C | -0.97795900 | 3.17381000  | -1.39927900 |
| C | -4.70645100 | 0.77445400  | 3.04224900  |
| C | -5.99663000 | 1.01096100  | 1.08851500  |
| C | -1.04624200 | -3.22562100 | -2.11938700 |
| C | 0.95020100  | 2.20656400  | -0.51971300 |
| C | 0.91798500  | 1.88590200  | -1.94147600 |
| C | -1.84565400 | -1.67669700 | -3.66273300 |
| C | -0.30214600 | 2.44987500  | -2.46300600 |

|   |             |             |             |
|---|-------------|-------------|-------------|
| C | -4.96984400 | -1.90732900 | -1.63634600 |
| C | 2.18790800  | 0.02182900  | 0.03678500  |
| C | -3.41965400 | 0.91518200  | 3.56254800  |
| C | -3.02762400 | -1.50448200 | 3.34689200  |
| C | -2.51630300 | 1.78943800  | -3.31341300 |
| C | -0.80941700 | 2.99896000  | 1.07603200  |
| C | 1.30202200  | 0.58790800  | -2.31584000 |
| C | -1.20932800 | 1.52716300  | 3.03152100  |
| C | -3.00311100 | 0.49098000  | -3.69025700 |
| C | -2.36414700 | -3.54227300 | 0.43487800  |
| C | -5.05217100 | -2.51839700 | 0.61465300  |
| C | -3.04630800 | 2.92562900  | 2.19366500  |
| C | -5.93416900 | 1.37501900  | -0.26074700 |
| C | -1.85096700 | -0.33244400 | -4.01120700 |
| C | 1.30886600  | -1.62836800 | -1.73904200 |
| C | -2.95413500 | 3.53467500  | -0.05992200 |
| C | -2.56216700 | -0.24715500 | 3.71521800  |
| C | -4.47475300 | -2.84842600 | -0.67667600 |
| C | 0.77180100  | -0.20915500 | 2.02883800  |
| C | -3.17015500 | -3.40434700 | -0.78656200 |
| C | -2.49622900 | -3.19394300 | -2.01758100 |
| N | 4.51297000  | -0.97182600 | 0.50180200  |
| N | 4.46718800  | 1.19245300  | 0.35482100  |

**nNHC-C<sub>70</sub>-3**

|   |            |             |             |
|---|------------|-------------|-------------|
| C | 3.57673200 | 0.16012200  | -0.37326700 |
| C | 5.62867000 | 1.00726800  | -0.72356300 |
| H | 6.37325200 | 1.78261000  | -0.77961600 |
| C | 5.69727800 | -0.33037800 | -0.92072800 |
| H | 6.51433800 | -0.97823600 | -1.18772300 |
| C | 3.90847200 | 2.63000500  | 0.02227500  |
| C | 3.51416400 | 3.54073700  | -0.97057100 |
| C | 3.14359700 | 4.81882700  | -0.54320300 |
| H | 2.81336500 | 5.54958700  | -1.27248200 |
| C | 3.17412800 | 5.16028200  | 0.80608000  |
| H | 2.86849700 | 6.15506400  | 1.11653600  |
| C | 3.59241600 | 4.23758000  | 1.76006600  |
| H | 3.61124300 | 4.51952600  | 2.80666900  |
| C | 3.97578300 | 2.94475700  | 1.39059300  |
| C | 3.50862200 | 3.17175800  | -2.44648200 |
| H | 3.35324100 | 2.08999100  | -2.51957800 |
| C | 2.37438000 | 3.84779500  | -3.22900300 |
| H | 2.55641300 | 4.92116300  | -3.35482100 |
| H | 1.41040600 | 3.71709300  | -2.73509300 |

|   |            |             |             |
|---|------------|-------------|-------------|
| H | 2.30431700 | 3.41004500  | -4.22999700 |
| C | 4.86519500 | 3.50761800  | -3.09649100 |
| H | 5.06888000 | 4.58190500  | -3.02372700 |
| H | 4.85481200 | 3.23467200  | -4.15745700 |
| H | 5.69619600 | 2.97703800  | -2.62217500 |
| C | 4.48815100 | 1.95377000  | 2.42677500  |
| H | 4.30378200 | 0.94452500  | 2.04880100  |
| C | 3.76682800 | 2.05561400  | 3.77783400  |
| H | 4.03350400 | 2.97484200  | 4.31134400  |
| H | 4.06114000 | 1.21430000  | 4.41384600  |
| H | 2.68175600 | 2.02996900  | 3.65921800  |
| C | 6.00856900 | 2.11434600  | 2.61771600  |
| H | 6.55579500 | 1.97051400  | 1.68084500  |
| H | 6.37996700 | 1.37960100  | 3.34088900  |
| H | 6.24620900 | 3.11509800  | 2.99575200  |
| C | 4.21298500 | -2.28511800 | -0.68513700 |
| C | 3.89483500 | -2.92290000 | -1.89486200 |
| C | 3.80476700 | -4.31629400 | -1.86837100 |
| H | 3.54063600 | -4.84910000 | -2.77460100 |
| C | 4.02712800 | -5.02817400 | -0.69204900 |
| H | 3.94412800 | -6.11094800 | -0.69331100 |
| C | 4.33812600 | -4.36045800 | 0.48807000  |
| H | 4.48841500 | -4.92739400 | 1.39958000  |
| C | 4.44038900 | -2.96633000 | 0.52321500  |
| C | 3.63916700 | -2.13837000 | -3.17351200 |
| H | 3.24249300 | -1.15939500 | -2.88337000 |
| C | 2.58936300 | -2.79857100 | -4.08040200 |
| H | 2.98786000 | -3.69441700 | -4.57042200 |
| H | 2.29187900 | -2.09880600 | -4.86784000 |
| H | 1.69464100 | -3.07768900 | -3.52003600 |
| C | 4.94428300 | -1.91295500 | -3.96091400 |
| H | 5.68510100 | -1.35121700 | -3.38396600 |
| H | 4.74058900 | -1.35177400 | -4.87973900 |
| H | 5.39335900 | -2.87228400 | -4.24203800 |
| C | 4.78147100 | -2.23779400 | 1.81847800  |
| H | 4.31013600 | -1.24960000 | 1.78016200  |
| C | 4.23333300 | -2.93727300 | 3.07093600  |
| H | 3.16882400 | -3.15913100 | 2.96955600  |
| H | 4.36315300 | -2.28225700 | 3.93914800  |
| H | 4.77078100 | -3.86849500 | 3.28316800  |
| C | 6.30257700 | -2.03599900 | 1.96577500  |
| H | 6.81402500 | -3.00487000 | 1.99258200  |
| H | 6.52584900 | -1.50873500 | 2.90033800  |
| H | 6.72787700 | -1.45272700 | 1.14486200  |

|   |             |             |             |
|---|-------------|-------------|-------------|
| C | 1.38464200  | -0.53282800 | 2.34238500  |
| C | -1.52487600 | 1.25077300  | 3.76046100  |
| C | -5.98249700 | -0.62328700 | 0.12643500  |
| C | 0.52606100  | 0.79632100  | -2.05536200 |
| C | -1.26327200 | 3.29172500  | 0.80037600  |
| C | -1.70732100 | -1.19433800 | 4.00615200  |
| C | -4.10466700 | -2.22509100 | -2.43727500 |
| C | -0.89288100 | -3.31035200 | 2.28398700  |
| C | -3.88977000 | -1.32335600 | 3.13305000  |
| C | -0.82849400 | -3.68267500 | 0.89580900  |
| C | -1.00615500 | 2.80957300  | 2.10740800  |
| C | -0.11814600 | 1.09103500  | 3.44286700  |
| C | -3.68632100 | 3.04088300  | 1.30020800  |
| C | 2.08153000  | 0.03227300  | -0.08340500 |
| C | -5.57621600 | -1.65029500 | -0.71819800 |
| C | -4.18794800 | 0.45476000  | -3.40519400 |
| C | 0.19478900  | 2.04634400  | 2.41075500  |
| C | 0.72082100  | -1.59829400 | -1.51709100 |
| C | -3.06505400 | -1.73891600 | -3.22636800 |
| C | -2.06434800 | 2.32007900  | 2.93871000  |
| C | -0.35510700 | -1.35146200 | 3.69037800  |
| C | -2.46089400 | -3.44558300 | -0.99476500 |
| C | -2.62324000 | 3.53422100  | 0.47030600  |
| C | -3.79233500 | -3.03972900 | -1.27973400 |
| C | -4.44586900 | 3.02046400  | -0.93140600 |
| C | 0.07401400  | -2.42983000 | 2.81025400  |
| C | -3.11423700 | -0.37680200 | -3.72794500 |
| C | 1.24706400  | 1.08495800  | -0.86545900 |
| C | 1.06432600  | 1.68148200  | 1.38872500  |
| C | -1.37395500 | -2.93329400 | -1.84365700 |
| C | -4.72479600 | -1.65572900 | 2.03291600  |
| C | -1.52475500 | 1.45782200  | -3.34088700 |
| C | -4.30599300 | -2.74627600 | 1.13947700  |
| C | -0.82815700 | 2.84061000  | -1.59834400 |
| C | -4.80932100 | 2.71333800  | 0.43810700  |
| C | -4.70667400 | -2.69605400 | -0.22329300 |
| C | -6.03913400 | 0.73762100  | -0.36350900 |
| C | -0.33701400 | 2.92049600  | -0.27734100 |
| C | -4.86820100 | 2.19242200  | -1.97534800 |
| C | -0.87813000 | -0.90938900 | -3.19694700 |
| C | -5.68493500 | 1.02401100  | -1.68514900 |
| C | -0.08733600 | -2.78052900 | -1.26183400 |
| C | -3.94526100 | 1.84125500  | -3.04000500 |
| C | -5.26976900 | -0.04771500 | -2.57170100 |

|   |             |             |             |
|---|-------------|-------------|-------------|
| C | -2.30048700 | 0.13103000  | 4.02618000  |
| C | 1.54322600  | -1.34159700 | -0.39341300 |
| C | 1.17886500  | -2.26335700 | 0.63097400  |
| C | -2.69689400 | -2.09153400 | 3.44360600  |
| C | 0.18523400  | -3.18149500 | 0.08109300  |
| C | -5.51178000 | -0.60015900 | 1.49940400  |
| C | 1.73257300  | 0.41043900  | 1.38769500  |
| C | -2.63602400 | 2.33052200  | -3.01318300 |
| C | -3.08317100 | 3.51577900  | -0.90556500 |
| C | -2.17672300 | -3.76149100 | 0.36307600  |
| C | 0.27438200  | -0.60218100 | -2.43852300 |
| C | 1.15906700  | -1.94512600 | 1.99527300  |
| C | -0.41066000 | 1.78031400  | -2.47292400 |
| C | -3.09034200 | -3.42362200 | 1.41853400  |
| C | -3.41142700 | 2.29846600  | 2.47813100  |
| C | -5.58455100 | 1.59620300  | 0.71573300  |
| C | -1.75694400 | 0.13429000  | -3.69047200 |
| C | -5.21436500 | -1.35941400 | -2.09491400 |
| C | -2.29784700 | -3.11592700 | 2.59598700  |
| C | 0.45603100  | -0.18450200 | 3.40149300  |
| C | -1.69333300 | -2.07721300 | -2.92718000 |
| C | -2.20155600 | 3.18235400  | -1.92515700 |
| C | -5.27117600 | 0.76790600  | 1.86461600  |
| C | 0.77500600  | 2.07945300  | 0.02469300  |
| C | -4.23339400 | 1.11554800  | 2.77034100  |
| C | -3.64829400 | 0.04377000  | 3.49787900  |
| N | 4.31589800  | 1.29939500  | -0.38211100 |
| N | 4.42712700  | -0.84571300 | -0.69394900 |

**nNHC-C<sub>70</sub>-4**

|   |            |             |             |
|---|------------|-------------|-------------|
| C | 3.47059300 | 0.05709100  | 0.05479900  |
| C | 5.57807100 | 0.81673300  | 0.21580900  |
| H | 6.34322000 | 1.54579600  | 0.41783400  |
| C | 5.64064500 | -0.46747300 | -0.20620800 |
| H | 6.47204100 | -1.10693300 | -0.44749300 |
| C | 3.82434700 | 2.49592000  | 0.66777000  |
| C | 3.63211200 | 3.37558600  | -0.41275400 |
| C | 3.28811000 | 4.69460700  | -0.09510000 |
| H | 3.10920100 | 5.40335400  | -0.89501100 |
| C | 3.14913100 | 5.10193500  | 1.22605800  |
| H | 2.86501300 | 6.12650400  | 1.44714600  |
| C | 3.36980100 | 4.20572200  | 2.26991400  |
| H | 3.25414600 | 4.54033400  | 3.29420400  |
| C | 3.72096900 | 2.87862100  | 2.01625900  |



|   |            |             |             |
|---|------------|-------------|-------------|
| C | 3.83810300 | 2.95455700  | -1.86415200 |
| H | 3.55782900 | 1.89985900  | -1.95159400 |
| C | 2.96557200 | 3.73721800  | -2.85700200 |
| H | 3.33334800 | 4.76098600  | -2.99092000 |
| H | 1.92544000 | 3.78350500  | -2.53309600 |
| H | 2.99976600 | 3.24979500  | -3.83671500 |
| C | 5.31694900 | 3.09615200  | -2.27796500 |
| H | 5.64049800 | 4.13867900  | -2.18192300 |
| H | 5.44467300 | 2.79620600  | -3.32431000 |
| H | 5.98456200 | 2.47871600  | -1.67237400 |
| C | 3.99200100 | 1.90679200  | 3.15570500  |
| H | 3.74676600 | 0.89979400  | 2.80132100  |
| C | 3.12500900 | 2.17598700  | 4.39440200  |
| H | 3.43443300 | 3.09218100  | 4.90979200  |
| H | 3.23420200 | 1.35057800  | 5.10561800  |
| H | 2.06743800 | 2.26038500  | 4.13696100  |
| C | 5.48204200 | 1.92695500  | 3.55020000  |
| H | 6.13602000 | 1.64381700  | 2.72008700  |
| H | 5.66543800 | 1.22812600  | 4.37393200  |
| H | 5.77619600 | 2.92878000  | 3.88277600  |
| C | 4.03220900 | -2.24258800 | -0.83477300 |
| C | 3.82573700 | -2.37433600 | -2.21968600 |
| C | 3.56876300 | -3.66418000 | -2.69532200 |
| H | 3.38425600 | -3.81409600 | -3.75257900 |
| C | 3.53432300 | -4.75474400 | -1.83167900 |
| H | 3.32173900 | -5.74483000 | -2.22404000 |
| C | 3.76941800 | -4.58776600 | -0.46993100 |
| H | 3.73603200 | -5.44748100 | 0.18974900  |
| C | 4.02671200 | -3.32237700 | 0.06337600  |
| C | 3.93017000 | -1.19006000 | -3.17389500 |
| H | 3.57253700 | -0.30104100 | -2.64427200 |
| C | 3.06435000 | -1.33789200 | -4.43302900 |
| H | 3.46811700 | -2.09658500 | -5.11320100 |
| H | 3.04922200 | -0.38833800 | -4.97792200 |
| H | 2.03408700 | -1.60174000 | -4.18836300 |
| C | 5.39565500 | -0.94855400 | -3.58836800 |
| H | 6.04676600 | -0.75486500 | -2.73205100 |
| H | 5.45963000 | -0.08355000 | -4.25802400 |
| H | 5.78998500 | -1.82102700 | -4.12149800 |
| C | 4.30970500 | -3.13880600 | 1.54725100  |
| H | 4.06047000 | -2.10562100 | 1.81083500  |
| C | 3.45561800 | -4.04846900 | 2.44223500  |
| H | 2.39612600 | -3.98851000 | 2.18747600  |
| H | 3.57282600 | -3.74932100 | 3.48879300  |

|   |             |             |             |
|---|-------------|-------------|-------------|
| H | 3.76765600  | -5.09608100 | 2.36642300  |
| C | 5.80555100  | -3.35915400 | 1.84476000  |
| H | 6.10484000  | -4.37901400 | 1.57793100  |
| H | 6.00562900  | -3.21482100 | 2.91224600  |
| H | 6.44415700  | -2.66723800 | 1.28675300  |
| C | 0.27812400  | -1.97638800 | 2.90615000  |
| C | -2.21385400 | 0.56345200  | 3.89277100  |
| C | -5.68716800 | 0.81851600  | -1.03164600 |
| C | 1.29692000  | 0.04602500  | -1.24132300 |
| C | -0.42744700 | 2.65934600  | 1.56786200  |
| C | -3.22200900 | -1.65730700 | 3.59686000  |
| C | -3.72347400 | -1.05277500 | -3.32068300 |
| C | -2.60240000 | -3.70260800 | 1.71650500  |
| C | -4.96131600 | -0.91108700 | 2.18894700  |
| C | -2.22995000 | -3.93644100 | 0.33177200  |
| C | -0.74713600 | 1.98557800  | 2.77617000  |
| C | -0.90031900 | -0.05631100 | 3.90353700  |
| C | -2.84304100 | 3.26749300  | 1.40897400  |
| C | 1.55150900  | -1.38412700 | 0.86897500  |
| C | -5.39471000 | -0.18156100 | -1.94922500 |
| C | -2.66792200 | 1.56238100  | -3.71060100 |
| C | 0.00308300  | 0.84053400  | 3.20813100  |
| C | 0.55762400  | -2.34037200 | -1.19435400 |
| C | -2.40674800 | -0.89133400 | -3.73226600 |
| C | -2.11670500 | 1.83308900  | 3.21655300  |
| C | -1.95252900 | -2.25766800 | 3.61041900  |
| C | -3.06063600 | -2.93915800 | -1.81002600 |
| C | -1.47495700 | 3.41447300  | 0.97461000  |
| C | -4.04851800 | -2.05514800 | -2.32406000 |
| C | -2.83454300 | 3.75238500  | -0.89538000 |
| C | -1.64176400 | -3.30152400 | 2.64750400  |
| C | -1.86950600 | 0.43960200  | -3.93759600 |
| C | 1.94950500  | -0.06681500 | 0.15443000  |
| C | 0.98136800  | 0.32407600  | 2.35149500  |
| C | -1.66849900 | -2.76497400 | -2.24238500 |
| C | -5.47108900 | -0.79812200 | 0.86916300  |
| C | 0.01488800  | 1.51480300  | -2.77879800 |
| C | -5.15155100 | -1.85651500 | -0.09995900 |
| C | 0.60320700  | 2.40770700  | -0.68571300 |
| C | -3.68102300 | 3.44910400  | 0.24968800  |
| C | -5.07627100 | -1.51735300 | -1.47741900 |
| C | -5.16846000 | 2.16207700  | -1.22461200 |
| C | 0.63645300  | 2.11691600  | 0.71098100  |
| C | -3.17126400 | 3.26514700  | -2.16246200 |

|   |             |             |             |
|---|-------------|-------------|-------------|
| C | -0.19561900 | -0.90654700 | -2.97845600 |
| C | -4.35491600 | 2.44791200  | -2.32961500 |
| C | -0.61803700 | -3.13236700 | -1.34776500 |
| C | -2.12191800 | 2.71366000  | -3.00993100 |
| C | -4.04709600 | 1.39538600  | -3.28487800 |
| C | -3.35380600 | -0.22929100 | 3.74577400  |
| C | 0.98596500  | -2.44547900 | 0.19890700  |
| C | 0.08626200  | -3.35019600 | 0.88445500  |
| C | -4.20890700 | -2.07472100 | 2.61608300  |
| C | -0.91295800 | -3.76741300 | -0.07197900 |
| C | -5.69301000 | 0.52028100  | 0.38686200  |
| C | 1.13970400  | -1.11335700 | 2.21926800  |
| C | -0.80254800 | 2.68764700  | -2.55828200 |
| C | -1.46491200 | 3.73725700  | -0.43146200 |
| C | -3.31236400 | -3.48142900 | -0.52094900 |
| C | 0.70079500  | -1.10716400 | -1.88937100 |
| C | -0.26227200 | -3.12351500 | 2.21980200  |
| C | 0.86977000  | 1.32000300  | -1.62227200 |
| C | -4.34161900 | -2.94511600 | 0.32281600  |
| C | -3.18501400 | 2.34418500  | 2.43488700  |
| C | -4.82438700 | 2.67144800  | 0.08118100  |
| C | -0.50087900 | 0.41844100  | -3.45612900 |
| C | -4.56403900 | 0.11009000  | -3.10034600 |
| C | -3.90847100 | -3.07616500 | 1.70245300  |
| C | -0.77227100 | -1.43742100 | 3.77155600  |
| C | -1.36867900 | -1.72140000 | -3.14860800 |
| C | -0.45538600 | 3.19881200  | -1.23840700 |
| C | -5.14754900 | 1.65856700  | 1.07111400  |
| C | 1.33920200  | 0.97495700  | 1.14103800  |
| C | -4.38446000 | 1.51093500  | 2.26135400  |
| C | -4.42118100 | 0.22983800  | 2.87677900  |
| N | 4.23437700  | 1.13603600  | 0.36270600  |
| N | 4.33448800  | -0.92302400 | -0.31553100 |

**nNHC-C<sub>70</sub>-5**

|   |            |             |             |
|---|------------|-------------|-------------|
| C | 3.41807100 | 0.03393000  | 0.17267100  |
| C | 5.55891200 | 0.72183600  | 0.17478900  |
| H | 6.36220600 | 1.42648900  | 0.04773100  |
| C | 5.55087500 | -0.58389700 | 0.52668600  |
| H | 6.34380900 | -1.26667300 | 0.77774800  |
| C | 3.90735000 | 2.41387600  | -0.55070200 |
| C | 3.85473700 | 2.58731400  | -1.94568600 |
| C | 3.57836600 | 3.87653800  | -2.41173000 |
| H | 3.50855800 | 4.05193000  | -3.47909800 |

|   |            |             |             |
|---|------------|-------------|-------------|
| C | 3.38859600 | 4.93380400  | -1.52783100 |
| H | 3.16636000 | 5.92482700  | -1.91259300 |
| C | 3.48809600 | 4.73211900  | -0.15445400 |
| H | 3.34469500 | 5.56743900  | 0.52140900  |
| C | 3.75646600 | 3.46469000  | 0.37010100  |
| C | 4.15375100 | 1.45347600  | -2.91802200 |
| H | 3.84361300 | 0.51740300  | -2.44529500 |
| C | 3.38214700 | 1.56079700  | -4.24048700 |
| H | 3.76729300 | 2.37295800  | -4.86768400 |
| H | 2.31621100 | 1.72716400  | -4.07509700 |
| H | 3.49684800 | 0.63081900  | -4.80687400 |
| C | 5.66546500 | 1.36979000  | -3.20836600 |
| H | 6.01867400 | 2.29561300  | -3.67643300 |
| H | 5.87210000 | 0.54138000  | -3.89560500 |
| H | 6.25439400 | 1.20516400  | -2.30189800 |
| C | 3.91715100 | 3.25703200  | 1.86896900  |
| H | 3.64576700 | 2.22030400  | 2.09112900  |
| C | 2.99675300 | 4.15735900  | 2.70568600  |
| H | 3.33294100 | 5.20043400  | 2.69043000  |
| H | 3.00828200 | 3.82699700  | 3.74936900  |
| H | 1.96556700 | 4.12215600  | 2.35128000  |
| C | 5.38100900 | 3.48031300  | 2.29775500  |
| H | 6.07191200 | 2.79432700  | 1.79956400  |
| H | 5.48494900 | 3.33239100  | 3.37848300  |
| H | 5.69772400 | 4.50300800  | 2.06347600  |
| C | 3.90084100 | -2.40548500 | 0.71504800  |
| C | 3.90395100 | -3.24622400 | -0.41336900 |
| C | 3.63685800 | -4.60009500 | -0.18812800 |
| H | 3.60733000 | -5.28390300 | -1.02823500 |
| C | 3.39004900 | -5.08010500 | 1.09416600  |
| H | 3.17192500 | -6.13364600 | 1.24231900  |
| C | 3.41862400 | -4.22043400 | 2.18845800  |
| H | 3.21903200 | -4.61046600 | 3.17969500  |
| C | 3.68112900 | -2.85745000 | 2.02701100  |
| C | 4.20467900 | -2.73371200 | -1.81847200 |
| H | 3.82172000 | -1.71013700 | -1.89334100 |
| C | 3.52172700 | -3.54944300 | -2.92627300 |
| H | 3.99045400 | -4.53261100 | -3.04831100 |
| H | 3.62271500 | -3.02076400 | -3.87988900 |
| H | 2.45733600 | -3.68873900 | -2.73001100 |
| C | 5.72288700 | -2.70051200 | -2.08835800 |
| H | 6.26122300 | -2.05466700 | -1.39110500 |
| H | 5.91527700 | -2.32908700 | -3.10126100 |
| H | 6.14438700 | -3.70917000 | -2.01103800 |

|   |             |             |             |
|---|-------------|-------------|-------------|
| C | 3.73154900  | -1.92019100 | 3.22668600  |
| H | 3.39496200  | -0.93225900 | 2.89492600  |
| C | 2.80540300  | -2.35417400 | 4.37305500  |
| H | 1.80075800  | -2.58857600 | 4.01628500  |
| H | 2.72495700  | -1.54409400 | 5.10446100  |
| H | 3.20191500  | -3.23153700 | 4.89687000  |
| C | 5.17167300  | -1.78213200 | 3.75987000  |
| H | 5.56154900  | -2.75927300 | 4.06700600  |
| H | 5.18842900  | -1.12059100 | 4.63313500  |
| H | 5.85455000  | -1.36577300 | 3.01448500  |
| C | -1.08219700 | 2.09984400  | 3.41676900  |
| C | -3.64328500 | 3.37219600  | 1.08709400  |
| C | -4.95262400 | -1.59119500 | -2.10124300 |
| C | 1.88191600  | 0.07780300  | 0.07392700  |
| C | -1.00720400 | 3.10028500  | -1.37754800 |
| C | -4.54737900 | 1.70612700  | 2.65517700  |
| C | -2.33263000 | -3.74024000 | -1.04883800 |
| C | -3.35747000 | -0.63010600 | 3.74828000  |
| C | -5.57896300 | 0.39835400  | 0.99030300  |
| C | -2.49052100 | -1.74540900 | 3.41715400  |
| C | -1.80398100 | 3.64621800  | -0.32926300 |
| C | -2.46762200 | 3.49621300  | 1.92751500  |
| C | -3.14993900 | 2.48824800  | -2.49890500 |
| C | 0.88405000  | 1.13696100  | 2.23397500  |
| C | -4.36730300 | -2.73356100 | -1.57093700 |
| C | -1.10125400 | -2.44500700 | -3.27032100 |
| C | -1.33218100 | 3.64489600  | 1.03785900  |
| C | 0.71098800  | -1.27823900 | 1.94837500  |
| C | -0.95678000 | -3.55639300 | -1.07472800 |
| C | -3.22749800 | 3.46995100  | -0.30143900 |
| C | -3.41520500 | 1.81710300  | 3.46529300  |
| C | -2.38970100 | -3.24396200 | 1.40855500  |
| C | -1.72588300 | 2.66491200  | -2.52860800 |
| C | -3.06125800 | -3.53191800 | 0.18968500  |
| C | -2.25888400 | 0.86830600  | -3.95698100 |
| C | -2.80162500 | 0.62163900  | 4.02223900  |
| C | -0.31872200 | -2.89831300 | -2.20163600 |
| C | 1.34511100  | 1.27462500  | 0.87743700  |
| C | -0.12932500 | 3.02736300  | 1.35071500  |
| C | -0.93713900 | -3.05035100 | 1.37335700  |
| C | -5.54697200 | -0.77923100 | 0.19526400  |
| C | 1.04348100  | -0.84579300 | -2.20935700 |
| C | -4.92595600 | -1.98623300 | 0.75693200  |
| C | 0.74138800  | 1.40743400  | -1.86873100 |

|   |             |             |             |
|---|-------------|-------------|-------------|
| C | -3.48530100 | 1.37902100  | -3.37454100 |
| C | -4.31525600 | -2.91322400 | -0.13121200 |
| C | -4.33893200 | -0.92340900 | -3.23218200 |
| C | 0.27621600  | 2.48141500  | -1.05619800 |
| C | -2.09242100 | -0.50385400 | -4.15578200 |
| C | 0.78723700  | -2.25447400 | -0.22973900 |
| C | -3.15821900 | -1.42200400 | -3.78739600 |
| C | -0.34297000 | -2.18026900 | 2.32020400  |
| C | -0.82500600 | -1.13497400 | -3.82775000 |
| C | -2.54500400 | -2.61832700 | -3.23203800 |
| C | -4.65895400 | 2.49593500  | 1.44223200  |
| C | 0.62282300  | -0.10581600 | 2.81120700  |
| C | -0.52378100 | -0.27331000 | 3.67982400  |
| C | -5.11098500 | 0.40253200  | 2.36334200  |
| C | -1.11386000 | -1.56594700 | 3.37811200  |
| C | -5.50184800 | -0.58491000 | -1.21198700 |
| C | 0.00854200  | 2.25853100  | 2.55996000  |
| C | 0.21941800  | -0.36257400 | -3.31358500 |
| C | -1.17395900 | 1.65927300  | -3.40896400 |
| C | -3.13847100 | -2.54633700 | 2.39420500  |
| C | 1.23804600  | -1.24821400 | 0.64486900  |
| C | -1.35824900 | 0.80335100  | 4.00470200  |
| C | 1.43545600  | 0.26719700  | -1.38618900 |
| C | -4.39337300 | -1.92813000 | 2.07381400  |
| C | -3.90795800 | 2.76381900  | -1.32960700 |
| C | -4.50183900 | 0.50368300  | -3.01943900 |
| C | 0.77601100  | -2.10860000 | -1.67871100 |
| C | -3.14837700 | -3.26408600 | -2.15033100 |
| C | -4.52600200 | -0.73918200 | 2.89596800  |
| C | -2.34962100 | 2.73261300  | 3.09066600  |
| C | -0.26403300 | -3.16111000 | 0.13164700  |
| C | 0.03019000  | 1.04621100  | -3.08854700 |
| C | -5.22749000 | 0.70506100  | -1.77872300 |
| C | 0.65934900  | 2.37819900  | 0.31235500  |
| C | -4.98221500 | 1.83490700  | -0.95228200 |
| C | -5.30445100 | 1.68841400  | 0.42395700  |
| N | 4.24078300  | 1.09321000  | -0.04705300 |
| N | 4.22550700  | -1.00415100 | 0.51193300  |

**aNHC-C<sub>70</sub>-1**

|   |             |             |             |
|---|-------------|-------------|-------------|
| C | -5.39092800 | 0.67783800  | 0.12555000  |
| C | -4.16450100 | -1.15726200 | -0.02045800 |
| H | -3.96772600 | -2.21496900 | -0.06406500 |
| C | -3.30127200 | -0.09587400 | -0.03523500 |

|   |             |             |             |
|---|-------------|-------------|-------------|
| C | -6.66566300 | -1.43633200 | 0.13619800  |
| C | -7.12964300 | -1.84658200 | 1.39559900  |
| C | -8.29216200 | -2.62428600 | 1.41576900  |
| H | -8.68733500 | -2.96679900 | 2.36686700  |
| C | -8.94405500 | -2.96843400 | 0.23408900  |
| H | -9.84320900 | -3.57625000 | 0.27284500  |
| C | -8.45145200 | -2.54216000 | -0.99719000 |
| H | -8.96858500 | -2.82168100 | -1.90945800 |
| C | -7.29372200 | -1.76160000 | -1.07640600 |
| C | -6.41038700 | -1.48542600 | 2.68660100  |
| H | -5.56207600 | -0.83848100 | 2.44195600  |
| C | -7.32468400 | -0.69716300 | 3.63871000  |
| H | -8.18208100 | -1.29767500 | 3.96156300  |
| H | -7.71049900 | 0.20991500  | 3.16134000  |
| H | -6.76903800 | -0.40045800 | 4.53452000  |
| C | -5.83788400 | -2.74110400 | 3.36653600  |
| H | -6.63480500 | -3.43398800 | 3.65866800  |
| H | -5.28335500 | -2.46394300 | 4.26916600  |
| H | -5.15457300 | -3.27574100 | 2.69872200  |
| C | -6.74013900 | -1.31900800 | -2.42268300 |
| H | -5.90860500 | -0.62984100 | -2.24553000 |
| C | -7.78859700 | -0.55774000 | -3.24944900 |
| H | -8.64003100 | -1.19587500 | -3.50929600 |
| H | -7.34325500 | -0.20155100 | -4.18437200 |
| H | -8.17296700 | 0.30977400  | -2.70238800 |
| C | -6.17418100 | -2.52105100 | -3.19926700 |
| H | -5.39211600 | -3.03061300 | -2.62672800 |
| H | -5.73932500 | -2.19006200 | -4.14834200 |
| H | -6.95863800 | -3.25279100 | -3.42231800 |
| C | -3.67790700 | 2.43345100  | 0.07062700  |
| C | -3.44669100 | 3.03888500  | 1.31583000  |
| C | -3.04773100 | 4.37822000  | 1.29680200  |
| H | -2.84361200 | 4.88627200  | 2.23236600  |
| C | -2.88774700 | 5.06037900  | 0.09400500  |
| H | -2.56244100 | 6.09642700  | 0.10282100  |
| C | -3.12946200 | 4.42510300  | -1.12092200 |
| H | -2.98944600 | 4.96989700  | -2.04736900 |
| C | -3.53228300 | 3.08740400  | -1.16362500 |
| C | -3.65879100 | 2.28987100  | 2.62414000  |
| H | -3.48868200 | 1.22648400  | 2.42726000  |
| C | -5.10509000 | 2.47432700  | 3.12357600  |
| H | -5.31071200 | 3.53066700  | 3.33057300  |
| H | -5.26497900 | 1.90961700  | 4.04887100  |
| H | -5.84538800 | 2.13262500  | 2.39186900  |

|   |             |             |             |
|---|-------------|-------------|-------------|
| C | -2.66587100 | 2.69442500  | 3.72231800  |
| H | -1.63454000 | 2.62832100  | 3.37019000  |
| H | -2.77595000 | 2.02292400  | 4.58021200  |
| H | -2.84873300 | 3.71370500  | 4.08124300  |
| C | -3.84328900 | 2.38946700  | -2.48150400 |
| H | -3.62640600 | 1.32352100  | -2.35261200 |
| C | -5.33696900 | 2.53762100  | -2.83328700 |
| H | -5.99067100 | 2.12860500  | -2.05534700 |
| H | -5.56298200 | 2.01366400  | -3.76886300 |
| H | -5.59867600 | 3.59364000  | -2.96373800 |
| C | -2.97764500 | 2.87844700  | -3.65053500 |
| H | -3.23245100 | 3.90332500  | -3.94284100 |
| H | -3.14675600 | 2.23982100  | -4.52371500 |
| H | -1.91464300 | 2.84203700  | -3.40232600 |
| C | -1.79334900 | -0.10106400 | -0.09081000 |
| C | 0.52919100  | 2.04804000  | -2.27677300 |
| C | 5.89633500  | -0.69171300 | -2.19304900 |
| C | 1.68351200  | -0.12694700 | 3.36204800  |
| C | 2.07946300  | 3.15200200  | 0.78916300  |
| C | 0.21407900  | -0.17640700 | -3.24945700 |
| C | 5.37806900  | -3.00945300 | 0.44230800  |
| C | 0.11310100  | -2.71509400 | -1.96781400 |
| C | 2.49877500  | -0.52110300 | -3.72699500 |
| C | 0.70347900  | -3.48986700 | -0.91044800 |
| C | 1.11289000  | 3.05451500  | -0.25843800 |
| C | -0.53322600 | 1.77380900  | -1.32821100 |
| C | 3.84953000  | 3.10218200  | -0.96738300 |
| C | -0.52074200 | -0.30565700 | 2.13989800  |
| C | 5.84616000  | -1.93078500 | -1.56838300 |
| C | 6.31950400  | -0.74397100 | 1.89020100  |
| C | -0.16886600 | 2.42639100  | -0.07451400 |
| C | 0.89381000  | -2.28752100 | 2.43537800  |
| C | 4.97148500  | -2.80924900 | 1.75679700  |
| C | 1.53778400  | 2.84288600  | -1.62111000 |
| C | -0.79080000 | -0.43961300 | -2.30212500 |
| C | 3.08020800  | -3.79039300 | -0.17954200 |
| C | 3.43166100  | 3.30400200  | 0.39718100  |
| C | 4.41328200  | -3.46012100 | -0.54319700 |
| C | 5.62315600  | 2.43654100  | 0.43258000  |
| C | -0.84002500 | -1.73417100 | -1.64887500 |
| C | 5.45601600  | -1.65828900 | 2.49646500  |
| C | 0.52063000  | 0.47314700  | 2.81173100  |
| C | -0.42845600 | 1.72695900  | 1.10706000  |
| C | 2.65540900  | -3.57763100 | 1.21323700  |



|   |             |             |             |
|---|-------------|-------------|-------------|
| C | 3.72320600  | -1.14412600 | -3.35646800 |
| C | 4.16513800  | 0.17180700  | 3.51278000  |
| C | 3.67045200  | -2.45620500 | -2.69548300 |
| C | 2.87257200  | 1.99799600  | 2.84362600  |
| C | 5.18981000  | 2.55570700  | -0.94767300 |
| C | 4.70379400  | -2.80084500 | -1.78633600 |
| C | 6.37993900  | 0.46671000  | -1.46882100 |
| C | 1.79082300  | 2.46674900  | 2.05345400  |
| C | 6.40501400  | 1.35143400  | 0.83374600  |
| C | 3.21232800  | -2.05795300 | 3.09919800  |
| C | 6.79748100  | 0.34018800  | -0.13894000 |
| C | 1.28824800  | -3.28270300 | 1.46770600  |
| C | 6.11634800  | 0.68039100  | 2.08914400  |
| C | 6.74467300  | -0.95131800 | 0.51212700  |
| C | 0.88889500  | 1.09272900  | -3.22305700 |
| C | -0.34133100 | -1.68737100 | 2.00227000  |
| C | -0.70197900 | -2.28668700 | 0.71930200  |
| C | 1.22230500  | -1.18281100 | -3.54219200 |
| C | 0.31219000  | -3.27590500 | 0.40760700  |
| C | 4.80561100  | -0.27723600 | -3.05793800 |
| C | -1.16000100 | 0.50787000  | 1.16168800  |
| C | 5.06015000  | 1.12662500  | 2.88890600  |
| C | 4.52267200  | 2.88982000  | 1.26161500  |
| C | 2.10838600  | -3.69994900 | -1.21191900 |
| C | 1.88603500  | -1.56668000 | 3.16824200  |
| C | -1.29470100 | -1.55675000 | -0.29866300 |
| C | 2.81961200  | 0.71556200  | 3.48926500  |
| C | 2.39697300  | -3.04368800 | -2.45557000 |
| C | 2.91192900  | 2.72496100  | -1.96464700 |
| C | 5.56420800  | 1.59183000  | -1.87690000 |
| C | 4.35550500  | -1.18974400 | 3.31720800  |
| C | 6.27737400  | -2.06715700 | -0.19140400 |
| C | 1.17303900  | -2.42018100 | -2.91829200 |
| C | -1.21658400 | 0.56844600  | -1.37139800 |
| C | 3.59828700  | -3.06112700 | 2.13963200  |
| C | 4.25047800  | 2.25175300  | 2.46488900  |
| C | 4.59911900  | 1.13042300  | -2.85702500 |
| C | 0.57541700  | 1.74160900  | 2.16970700  |
| C | 3.30318700  | 1.70461000  | -2.95033400 |
| C | 2.29423200  | 0.88527800  | -3.52518200 |
| N | -5.45504600 | -0.65540100 | 0.08217600  |
| N | -4.10444500 | 1.04741000  | 0.05730800  |
| H | -6.23320300 | 1.34397900  | 0.20237500  |

**aNHC-C<sub>70</sub>-2**

|   |            |             |             |
|---|------------|-------------|-------------|
| C | 5.32961600 | 0.39210200  | 0.42732400  |
| C | 3.19124000 | -0.12034700 | 0.03205800  |
| C | 3.97828600 | -1.15687600 | -0.39020800 |
| H | 3.70852700 | -2.09054200 | -0.85358200 |
| C | 3.74302900 | 2.13721500  | 1.10310900  |
| C | 3.46139800 | 2.20673200  | 2.47703100  |
| C | 3.16397500 | 3.47059900  | 2.99377100  |
| H | 2.92713300 | 3.57471000  | 4.04635500  |
| C | 3.14930100 | 4.59360900  | 2.17089600  |
| H | 2.90312900 | 5.56423700  | 2.59114600  |
| C | 3.43421700 | 4.48311400  | 0.81312300  |
| H | 3.40407700 | 5.36670800  | 0.18604700  |
| C | 3.73827800 | 3.24467800  | 0.24023400  |
| C | 3.51862100 | 0.97399400  | 3.36955700  |
| H | 3.25874800 | 0.10505200  | 2.75607300  |
| C | 4.94569900 | 0.76573900  | 3.91311600  |
| H | 5.24990000 | 1.61482400  | 4.53536900  |
| H | 5.68317600 | 0.66357400  | 3.10975300  |
| H | 4.99298200 | -0.14033200 | 4.52767300  |
| C | 2.51058100 | 1.01355400  | 4.52618300  |
| H | 2.78128800 | 1.76667700  | 5.27465200  |
| H | 2.49383600 | 0.04283100  | 5.03244200  |
| H | 1.50141000 | 1.22885900  | 4.16771600  |
| C | 4.08547300 | 3.11561500  | -1.23690500 |
| H | 3.80671300 | 2.10497300  | -1.55324100 |
| C | 5.59851700 | 3.30740200  | -1.45812600 |
| H | 5.91071600 | 4.31019800  | -1.14510600 |
| H | 5.84704100 | 3.19052100  | -2.51887000 |
| H | 6.19854400 | 2.58509400  | -0.89406100 |
| C | 3.29823400 | 4.08444600  | -2.13017800 |
| H | 2.22410500 | 4.01035500  | -1.94858300 |
| H | 3.48219200 | 3.84290100  | -3.18222700 |
| H | 3.60889500 | 5.12412900  | -1.97573600 |
| C | 6.45926900 | -1.60474400 | -0.48065000 |
| C | 6.97106000 | -2.48559300 | 0.48400500  |
| C | 8.08900900 | -3.24244000 | 0.11730600  |
| H | 8.52222900 | -3.93455000 | 0.83264800  |
| C | 8.64810700 | -3.12303200 | -1.15249300 |
| H | 9.51308300 | -3.72352000 | -1.41837900 |
| C | 8.10625600 | -2.24213400 | -2.08590100 |
| H | 8.55091800 | -2.16503900 | -3.07288700 |
| C | 6.99378000 | -1.45555000 | -1.77079700 |
| C | 6.35553300 | -2.62463900 | 1.86800900  |

|   |             |             |             |
|---|-------------|-------------|-------------|
| H | 5.48151400  | -1.96812700 | 1.92567400  |
| C | 7.34094800  | -2.17522000 | 2.95983700  |
| H | 8.23115800  | -2.81350100 | 2.97945900  |
| H | 6.86651000  | -2.22865200 | 3.94541700  |
| H | 7.67283500  | -1.14392800 | 2.79736300  |
| C | 5.85784600  | -4.05861300 | 2.11521700  |
| H | 5.13515200  | -4.36307800 | 1.35122800  |
| H | 5.36965900  | -4.12591500 | 3.09319900  |
| H | 6.68442000  | -4.77740400 | 2.10284500  |
| C | 6.38469100  | -0.51295300 | -2.79860900 |
| H | 5.63027700  | 0.10345600  | -2.30010800 |
| C | 7.43085300  | 0.44467100  | -3.39095800 |
| H | 7.93716300  | 1.01661000  | -2.60621500 |
| H | 6.94601800  | 1.15333900  | -4.07047700 |
| H | 8.19469500  | -0.09276000 | -3.96317800 |
| C | 5.66417800  | -1.30915000 | -3.90115800 |
| H | 6.36718200  | -1.94889400 | -4.44637800 |
| H | 5.19558600  | -0.62754800 | -4.61880100 |
| H | 4.88094700  | -1.94933400 | -3.48218300 |
| C | 1.30478800  | 1.14730700  | -1.06068300 |
| C | -0.74897400 | -0.74927900 | -3.49251100 |
| C | -6.36043900 | -0.12488500 | -1.30241500 |
| C | -0.67832800 | -1.04609100 | 2.66005000  |
| C | -1.04419500 | -3.23149000 | -0.87701700 |
| C | -1.29340600 | 1.63442900  | -3.51752300 |
| C | -5.63476300 | 1.23640500  | 1.88696500  |
| C | -1.41601200 | 3.50247200  | -1.37124800 |
| C | -3.62634400 | 1.34001500  | -3.37910500 |
| C | -1.82314000 | 3.67320200  | -0.00124100 |
| C | -0.50095100 | -2.48766700 | -1.95597500 |
| C | 0.46275100  | -0.48262800 | -2.76008800 |
| C | -3.20751200 | -3.20094400 | -2.09975600 |
| C | 0.98640800  | 0.23409900  | 1.28765600  |
| C | -6.41928500 | 0.78419100  | -0.25695800 |
| C | -5.55258900 | -1.55112700 | 2.46234200  |
| C | 0.58819100  | -1.54777300 | -1.76727700 |
| C | -0.75335700 | 1.42013400  | 2.53827100  |
| C | -4.83031600 | 0.76593400  | 2.91582800  |
| C | -1.32642400 | -1.99609800 | -3.01673600 |
| C | -0.14645100 | 1.91674400  | -2.76150300 |
| C | -3.88355000 | 2.90146200  | 1.21615800  |
| C | -2.37685800 | -3.69681500 | -1.03957500 |
| C | -5.14505400 | 2.27969700  | 1.00283700  |
| C | -4.59433300 | -3.66558400 | -0.25226600 |

|   |             |             |             |
|---|-------------|-------------|-------------|
| C | -0.21003100 | 2.85476800  | -1.68134900 |
| C | -4.78828300 | -0.65380000 | 3.21226800  |
| C | 0.38231700  | -1.00043300 | 1.70974100  |
| C | 1.07579200  | -1.31742900 | -0.50026000 |
| C | -3.02654800 | 2.39227300  | 2.29616100  |
| C | -4.79360600 | 1.37011700  | -2.57120700 |
| C | -2.85718900 | -2.17949800 | 3.14700100  |
| C | -4.85635300 | 2.33542000  | -1.46165700 |
| C | -1.43542400 | -3.15060100 | 1.57210300  |
| C | -4.57611400 | -3.17500900 | -1.61755100 |
| C | -5.63028100 | 2.00531600  | -0.31662900 |
| C | -6.32077200 | -1.54646100 | -1.02521800 |
| C | -0.55821900 | -2.94675700 | 0.47224500  |
| C | -5.45269000 | -3.09263500 | 0.68897100  |
| C | -2.63048600 | 0.24270500  | 3.49230600  |
| C | -6.33677900 | -2.00990900 | 0.29464700  |
| C | -1.61665100 | 2.49424100  | 2.14707700  |
| C | -4.96743000 | -2.81209300 | 2.03189700  |
| C | -6.39812900 | -1.05807100 | 1.38938200  |
| C | -1.60308100 | 0.28112300  | -3.89939000 |
| C | 0.39335400  | 1.42322400  | 1.64989600  |
| C | 0.26109700  | 2.54783300  | 0.72739000  |
| C | -2.54488900 | 2.28991200  | -3.18956400 |
| C | -1.00403600 | 3.17157100  | 1.01634700  |
| C | -5.51058500 | 0.14929900  | -2.45129300 |
| C | 1.69389100  | 0.04039700  | -0.08016500 |
| C | -3.64937600 | -3.11810100 | 2.37178000  |
| C | -3.22276200 | -3.97469500 | 0.10450200  |
| C | -3.26079400 | 3.47331300  | 0.07620600  |
| C | -1.26626600 | 0.22005900  | 3.09459400  |
| C | 0.63648300  | 2.32679000  | -0.60662000 |
| C | -1.49559300 | -2.20960700 | 2.65345700  |
| C | -3.74785300 | 3.19620200  | -1.24742200 |
| C | -2.72786100 | -2.23508700 | -3.02505200 |
| C | -5.41800300 | -2.13754400 | -1.99365200 |
| C | -3.41613900 | -0.97386300 | 3.55578800  |
| C | -6.44064900 | 0.31277100  | 1.11263900  |
| C | -2.60497500 | 3.20179700  | -2.14362600 |
| C | 0.74298000  | 0.82879900  | -2.33599700 |
| C | -3.49828600 | 1.31478500  | 3.09433300  |
| C | -2.75935800 | -3.70906100 | 1.38793000  |
| C | -4.92785000 | -1.08977700 | -2.87226000 |
| C | 0.43816800  | -1.94131000 | 0.62477300  |
| C | -3.62222600 | -1.14373200 | -3.43461400 |

|   |             |             |             |
|---|-------------|-------------|-------------|
| C | -3.04134700 | 0.09767000  | -3.80295700 |
| N | 4.07195000  | 0.84126100  | 0.54168900  |
| N | 5.30120300  | -0.81709900 | -0.13924000 |
| H | 6.21603200  | 0.91813300  | 0.73793800  |

**aNHC-C<sub>70</sub>-3**

|   |            |             |             |
|---|------------|-------------|-------------|
| C | 5.22982800 | 0.22719200  | -0.63041600 |
| C | 3.95550000 | -0.60346900 | 0.97594800  |
| H | 3.71668400 | -1.13896600 | 1.87856900  |
| C | 3.12732000 | 0.05740800  | 0.11139800  |
| C | 6.41998400 | -1.11383900 | 1.06875500  |
| C | 6.69273400 | -2.44175200 | 0.69882000  |
| C | 7.81293000 | -3.03899700 | 1.28465000  |
| H | 8.06160000 | -4.06536500 | 1.03628200  |
| C | 8.61318800 | -2.33471600 | 2.18224700  |
| H | 9.47976300 | -2.81838500 | 2.62333000  |
| C | 8.31137300 | -1.01822200 | 2.51976500  |
| H | 8.94517100 | -0.48309700 | 3.21954700  |
| C | 7.19567700 | -0.37467800 | 1.97322200  |
| C | 5.79561700 | -3.21281300 | -0.25972300 |
| H | 5.16826400 | -2.49392400 | -0.79681900 |
| C | 6.59616500 | -3.98547000 | -1.31874400 |
| H | 7.18515100 | -4.79488600 | -0.87444500 |
| H | 7.28128400 | -3.32611800 | -1.86191800 |
| H | 5.91131100 | -4.43948900 | -2.04261400 |
| C | 4.85165000 | -4.14898300 | 0.51800100  |
| H | 5.42147500 | -4.88958200 | 1.09020000  |
| H | 4.19177600 | -4.68399900 | -0.17303600 |
| H | 4.22169500 | -3.59270800 | 1.21926500  |
| C | 6.86575100 | 1.06438300  | 2.33902700  |
| H | 5.90036500 | 1.32036700  | 1.89096000  |
| C | 7.91525000 | 2.02817500  | 1.75813000  |
| H | 8.90586800 | 1.83688600  | 2.18540100  |
| H | 7.64481300 | 3.06600400  | 1.98001900  |
| H | 7.99613600 | 1.92284200  | 0.67052500  |
| C | 6.71949800 | 1.24552800  | 3.85858900  |
| H | 5.96094200 | 0.56980300  | 4.26631500  |
| H | 6.41951300 | 2.27347800  | 4.08745800  |
| H | 7.66255500 | 1.04968700  | 4.38046300  |
| C | 3.57719000 | 1.31746400  | -2.07423100 |
| C | 3.30949100 | 0.59162800  | -3.24579500 |
| C | 2.93841600 | 1.33221600  | -4.37186800 |
| H | 2.70866900 | 0.81682400  | -5.29746700 |
| C | 2.83658900 | 2.71953100  | -4.31348400 |

|   |             |             |             |
|---|-------------|-------------|-------------|
| H | 2.53331700  | 3.27366500  | -5.19681500 |
| C | 3.10681900  | 3.40237000  | -3.13081300 |
| H | 3.00701900  | 4.48123200  | -3.10065700 |
| C | 3.48309000  | 2.71380400  | -1.97417800 |
| C | 3.43285700  | -0.92469900 | -3.29909600 |
| H | 3.25692100  | -1.31071300 | -2.28935500 |
| C | 4.85084400  | -1.34269500 | -3.73414600 |
| H | 5.07051200  | -0.96779700 | -4.73995800 |
| H | 4.93880000  | -2.43473600 | -3.75127500 |
| H | 5.62328000  | -0.95517100 | -3.06108500 |
| C | 2.38476100  | -1.57711900 | -4.21098600 |
| H | 1.37827800  | -1.22272900 | -3.98165700 |
| H | 2.40065100  | -2.66308100 | -4.07382900 |
| H | 2.58982000  | -1.37821100 | -5.26896800 |
| C | 3.80064800  | 3.44572300  | -0.67841100 |
| H | 3.57980900  | 2.76595300  | 0.15053500  |
| C | 5.29714000  | 3.80736400  | -0.61602200 |
| H | 5.93837400  | 2.92297300  | -0.70180000 |
| H | 5.53228600  | 4.30107600  | 0.33355200  |
| H | 5.56499600  | 4.49044500  | -1.42998800 |
| C | 2.93398200  | 4.69427200  | -0.46502600 |
| H | 3.19806800  | 5.49544800  | -1.16454200 |
| H | 3.08855200  | 5.08083000  | 0.54739300  |
| H | 1.87149900  | 4.46906100  | -0.58293300 |
| C | 0.67334000  | 2.33526300  | 1.28099600  |
| C | -2.36185400 | 3.80758300  | -0.22719900 |
| C | -6.40910100 | -0.59846300 | 0.66531200  |
| C | 0.30171500  | -1.71443800 | -1.01491600 |
| C | -1.77302300 | 1.42482000  | -2.86848300 |
| C | -2.58048200 | 3.47858500  | 2.20509200  |
| C | -4.27259700 | -3.24480800 | 1.71177100  |
| C | -1.59431200 | 1.42127600  | 3.90902700  |
| C | -4.65658100 | 2.37653700  | 2.07498700  |
| C | -1.38284400 | 0.00058700  | 3.96598500  |
| C | -1.66081100 | 2.61066000  | -2.10015900 |
| C | -0.92982200 | 3.61182000  | -0.10199700 |
| C | -4.23736600 | 1.59945800  | -2.58053400 |
| C | 1.62177500  | 0.18722200  | 0.20839600  |
| C | -5.91887600 | -1.60413800 | 1.49082400  |
| C | -4.23765100 | -3.59094300 | -1.11768400 |
| C | -0.50202500 | 2.86191800  | -1.25557200 |
| C | 0.43922200  | -1.71801500 | 1.45260400  |
| C | -3.15048500 | -3.78999600 | 1.09234900  |
| C | -2.80477700 | 3.19493300  | -1.46772300 |

|   |             |             |             |
|---|-------------|-------------|-------------|
| C | -1.20255000 | 3.27795400  | 2.32714600  |
| C | -2.79995300 | -1.94759900 | 3.26721900  |
| C | -3.08828000 | 1.01665500  | -3.21525100 |
| C | -4.09134000 | -2.27267700 | 2.77158100  |
| C | -4.75009700 | -0.64745200 | -3.07650600 |
| C | -0.68394900 | 2.22758000  | 3.19467600  |
| C | -3.13881900 | -3.97656600 | -0.34782500 |
| C | 0.88476400  | -0.42044500 | -1.01148000 |
| C | 0.46818700  | 1.87832600  | -1.10000100 |
| C | -1.62460200 | -2.54296500 | 2.61300500  |
| C | -5.36975900 | 1.14919200  | 2.13090900  |
| C | -1.59222200 | -3.02655300 | -2.00547500 |
| C | -4.86262400 | 0.08342900  | 3.00844600  |
| C | -1.08117800 | -0.95666400 | -2.94907200 |
| C | -5.26169100 | 0.57301900  | -2.48440000 |
| C | -5.11377100 | -1.26818900 | 2.64577400  |
| C | -6.40634100 | -0.77462000 | -0.77130300 |
| C | -0.73656000 | 0.39364200  | -2.72167900 |
| C | -5.06110600 | -1.88859200 | -2.51342000 |
| C | -0.97559600 | -3.34718600 | 0.35437200  |
| C | -5.91025000 | -1.95452300 | -1.33390000 |
| C | -0.40717300 | -1.81212400 | 2.63218900  |
| C | -4.02969700 | -2.90195700 | -2.38133300 |
| C | -5.40612800 | -3.00991000 | -0.47401300 |
| C | -3.16641000 | 3.73317700  | 0.90127800  |
| C | 1.13822300  | -0.48449100 | 1.47685600  |
| C | 0.65804900  | 0.26833100  | 2.58915900  |
| C | -3.50768000 | 2.63021800  | 2.92659500  |
| C | -0.28357200 | -0.57198500 | 3.32744900  |
| C | -6.08915500 | 0.78623900  | 0.96100200  |
| C | 1.11900000  | 1.65475000  | 0.15919800  |
| C | -2.72870200 | -2.63001400 | -2.81479300 |
| C | -3.39611300 | -0.36933700 | -3.51467700 |
| C | -2.66578900 | -0.67346000 | 3.88505000  |
| C | 0.09317900  | -2.42675300 | 0.25875400  |
| C | 0.48683000  | 1.66178600  | 2.57628900  |
| C | -0.57675500 | -1.99775500 | -2.09617700 |
| C | -3.68728200 | 0.32931500  | 3.76489500  |
| C | -4.09422400 | 2.60245900  | -1.58682800 |
| C | -6.06701100 | 0.51093600  | -1.35574200 |
| C | -1.79115200 | -3.68273400 | -0.79800500 |
| C | -5.40891300 | -2.83567800 | 0.91213600  |
| C | -3.02381000 | 1.62115400  | 3.74784400  |
| C | -0.36101700 | 3.34459600  | 1.14915200  |

|   |             |             |             |
|---|-------------|-------------|-------------|
| C | -1.82116800 | -3.43367700 | 1.52835700  |
| C | -2.41059200 | -1.33996200 | -3.39184900 |
| C | -5.88363200 | 1.47149200  | -0.28438500 |
| C | 0.33262700  | 0.61513400  | -1.80288600 |
| C | -4.94821400 | 2.53538500  | -0.39236300 |
| C | -4.44998100 | 3.06130100  | 0.83055600  |
| N | 5.25243000  | -0.48936900 | 0.49730200  |
| N | 3.96126300  | 0.57166900  | -0.89278000 |
| H | 6.08653500  | 0.47625700  | -1.23356400 |

**aNHC-C<sub>70</sub>-4**

|   |             |             |             |
|---|-------------|-------------|-------------|
| C | -5.12029200 | 0.48387600  | 0.18103300  |
| C | -3.69604300 | -0.95285900 | -0.70998000 |
| H | -3.37436500 | -1.87531800 | -1.15935400 |
| C | -2.96666800 | 0.13148700  | -0.30637200 |
| C | -6.07555700 | -1.70784500 | -0.45130800 |
| C | -6.09513500 | -2.68109300 | 0.56374300  |
| C | -7.10058100 | -3.64936200 | 0.48238500  |
| H | -7.15350800 | -4.42624800 | 1.23781100  |
| C | -8.03481400 | -3.62706200 | -0.55134000 |
| H | -8.80968500 | -4.38694200 | -0.59162700 |
| C | -7.98378400 | -2.64186200 | -1.53448100 |
| H | -8.71924900 | -2.64025900 | -2.33208000 |
| C | -6.98895900 | -1.65851800 | -1.51340700 |
| C | -5.06262700 | -2.70337000 | 1.68411000  |
| H | -4.54588800 | -1.73869100 | 1.69555900  |
| C | -5.70902900 | -2.87591800 | 3.06724200  |
| H | -6.18219500 | -3.85759100 | 3.17701600  |
| H | -6.46981400 | -2.11012500 | 3.25138200  |
| H | -4.94298200 | -2.79323200 | 3.84533500  |
| C | -3.99464100 | -3.78471400 | 1.43253400  |
| H | -4.43969000 | -4.78574300 | 1.46278100  |
| H | -3.21106800 | -3.72776300 | 2.19474600  |
| H | -3.51089300 | -3.65913800 | 0.45946500  |
| C | -6.92720100 | -0.57121100 | -2.57552400 |
| H | -5.94836000 | -0.08472000 | -2.50549800 |
| C | -7.99976200 | 0.50153500  | -2.31212700 |
| H | -9.00544400 | 0.07127700  | -2.37604900 |
| H | -7.92547100 | 1.30818600  | -3.04921200 |
| H | -7.89238500 | 0.94239500  | -1.31444600 |
| C | -7.04864300 | -1.13584100 | -3.99917100 |
| H | -6.29498100 | -1.90740400 | -4.18567700 |
| H | -6.90721800 | -0.33447000 | -4.73189600 |
| H | -8.03541200 | -1.57536700 | -4.17961900 |



|   |             |             |             |
|---|-------------|-------------|-------------|
| C | -3.65020300 | 2.32299900  | 0.84387700  |
| C | -3.50492700 | 2.38554900  | 2.23882800  |
| C | -3.28666200 | 3.65158800  | 2.78965800  |
| H | -3.15379400 | 3.74971300  | 3.86108500  |
| C | -3.21117900 | 4.78174000  | 1.98035300  |
| H | -3.02852700 | 5.75338200  | 2.42961100  |
| C | -3.35047500 | 4.67609500  | 0.59910000  |
| H | -3.26994500 | 5.56414600  | -0.01717000 |
| C | -3.56963800 | 3.43592400  | -0.00677100 |
| C | -3.58187100 | 1.14547000  | 3.11824400  |
| H | -3.31581400 | 0.28168700  | 2.50068800  |
| C | -5.01069600 | 0.93879700  | 3.65563400  |
| H | -5.31783200 | 1.78919700  | 4.27469200  |
| H | -5.05863800 | 0.03449100  | 4.27200800  |
| H | -5.74690400 | 0.83431300  | 2.85081600  |
| C | -2.57673800 | 1.17812100  | 4.27924600  |
| H | -1.57234500 | 1.42755800  | 3.93194900  |
| H | -2.53753000 | 0.19520400  | 4.75956900  |
| H | -2.86801600 | 1.90574300  | 5.04519100  |
| C | -3.73893800 | 3.30406200  | -1.51336800 |
| H | -3.40624600 | 2.30183500  | -1.80054700 |
| C | -5.22332300 | 3.44030000  | -1.90328900 |
| H | -5.84814100 | 2.69083300  | -1.40430900 |
| H | -5.34784100 | 3.31640000  | -2.98494700 |
| H | -5.60729200 | 4.42893600  | -1.62754500 |
| C | -2.87377800 | 4.29531300  | -2.30364000 |
| H | -3.23362800 | 5.32473600  | -2.19602400 |
| H | -2.90899100 | 4.04667900  | -3.36913100 |
| H | -1.83045700 | 4.25894700  | -1.98046200 |
| C | 0.49123600  | 3.46678300  | -0.28855000 |
| C | 2.76258700  | 2.68465800  | 2.51621400  |
| C | 5.96743300  | -1.88388600 | 0.22971700  |
| C | -0.87065800 | -0.99292400 | -0.92411900 |
| C | 0.67207200  | -0.23212900 | 2.89489400  |
| C | 3.96851500  | 3.55023400  | 0.55858600  |
| C | 4.09568100  | -2.60052400 | -2.69937900 |
| C | 3.46662900  | 3.14480600  | -2.21348600 |
| C | 5.56181300  | 1.81097500  | 0.50990300  |
| C | 3.05600800  | 2.14970500  | -3.18819700 |
| C | 1.11441000  | 1.11423900  | 3.00787500  |
| C | 1.51835500  | 3.15291300  | 1.93230700  |
| C | 3.00953800  | -0.91436400 | 3.44727900  |
| C | -0.92606700 | 1.56033200  | -0.98442000 |
| C | 5.73302700  | -2.08055900 | -1.12443100 |

|   |             |             |             |
|---|-------------|-------------|-------------|
| C | 2.77186400  | -4.24833000 | -0.79225200 |
| C | 0.50042800  | 2.16894500  | 2.25030800  |
| C | 0.05937000  | 0.26584700  | -2.86136300 |
| C | 2.75329000  | -2.91269900 | -2.86838000 |
| C | 2.51095900  | 1.43964000  | 3.19912200  |
| C | 2.76547200  | 4.00302300  | -0.00810100 |
| C | 3.68797000  | -0.25592400 | -3.48319800 |
| C | 1.61444700  | -1.23261000 | 3.25458500  |
| C | 4.56126100  | -1.25425000 | -2.97032400 |
| C | 2.84775400  | -3.10061000 | 2.58772800  |
| C | 2.51433700  | 3.79446900  | -1.42579700 |
| C | 2.07917500  | -3.75602200 | -1.89993500 |
| C | -1.46004400 | 0.28393000  | -0.29957400 |
| C | -0.45113700 | 1.81957900  | 1.28808500  |
| C | 2.26805500  | -0.58484200 | -3.65773900 |
| C | 5.99707100  | 0.60047200  | -0.08998700 |
| C | 0.15490600  | -3.19925100 | -0.47442700 |
| C | 5.73831000  | 0.39432700  | -1.52232700 |
| C | -0.44236700 | -1.89152400 | 1.39342300  |
| C | 3.77116200  | -2.05710300 | 3.00998300  |
| C | 5.56864200  | -0.93293100 | -1.99873400 |
| C | 5.31186900  | -2.72633600 | 1.21541700  |
| C | -0.38032400 | -0.55967000 | 1.91627500  |
| C | 3.17524000  | -3.92530000 | 1.50598200  |
| C | 0.58959600  | -2.07650000 | -2.59963800 |
| C | 4.42397700  | -3.72894400 | 0.80090300  |
| C | 1.29936400  | 0.45961000  | -3.53519500 |
| C | 2.14785700  | -4.23684900 | 0.52115000  |
| C | 4.17901500  | -3.92864100 | -0.61863600 |
| C | 3.96700700  | 2.88859000  | 1.83948100  |
| C | -0.30173900 | 1.53020400  | -2.21389700 |
| C | 0.71772700  | 2.50993900  | -2.53643600 |
| C | 4.94683100  | 2.86777100  | -0.27040000 |
| C | 1.71162700  | 1.84291600  | -3.34609400 |
| C | 6.06672900  | -0.53779800 | 0.75845100  |
| C | -0.47277500 | 2.49906700  | 0.00525200  |
| C | 0.85864900  | -3.72632400 | 0.67265700  |
| C | 1.50815900  | -2.58169600 | 2.75274200  |
| C | 4.04903200  | 1.09172700  | -3.21375400 |
| C | -0.22656000 | -0.97365400 | -2.21923400 |
| C | 1.10529800  | 3.46871200  | -1.59335400 |
| C | -0.62215700 | -2.05088300 | -0.05117800 |
| C | 5.05851400  | 1.41148100  | -2.24554000 |
| C | 3.48665000  | 0.41171000  | 3.25748600  |

|   |             |             |             |
|---|-------------|-------------|-------------|
| C | 4.97810400  | -1.88092700 | 2.33607600  |
| C | 0.74239300  | -3.21795300 | -1.73339300 |
| C | 4.82693800  | -3.12425700 | -1.55999300 |
| C | 4.70344800  | 2.67435700  | -1.62358400 |
| C | 1.52048500  | 3.80249400  | 0.69792500  |
| C | 1.82814100  | -1.88230300 | -3.30492500 |
| C | 0.51704700  | -2.87329200 | 1.80559800  |
| C | 5.44294000  | -0.53406100 | 2.05133500  |
| C | -0.92310700 | 0.49000700  | 1.14829700  |
| C | 4.75327800  | 0.61002900  | 2.53690300  |
| C | 4.94437400  | 1.81613500  | 1.80802400  |
| N | -5.02530500 | -0.72055900 | -0.39096500 |
| N | -3.89627100 | 1.02570100  | 0.24551400  |
| H | -6.02621600 | 0.93961500  | 0.54284200  |

**aNHC-C<sub>70</sub>-5**

|   |             |             |             |
|---|-------------|-------------|-------------|
| C | -5.05713000 | -0.64314300 | 0.19937000  |
| C | -2.94331500 | -0.10225700 | -0.29577300 |
| C | -3.77076800 | 0.90542100  | -0.71057300 |
| H | -3.53258100 | 1.84056600  | -1.18560000 |
| C | -3.43397800 | -2.32986400 | 0.89317200  |
| C | -3.27030600 | -2.34545900 | 2.28822600  |
| C | -2.94787900 | -3.57602400 | 2.86809600  |
| H | -2.79655800 | -3.63602000 | 3.93994600  |
| C | -2.80326400 | -4.71882700 | 2.08669600  |
| H | -2.54164600 | -5.66200200 | 2.55718600  |
| C | -2.98074500 | -4.66323000 | 0.70702400  |
| H | -2.85188700 | -5.56150900 | 0.11461600  |
| C | -3.29856800 | -3.45991100 | 0.07128800  |
| C | -3.47295400 | -1.09921900 | 3.14129700  |
| H | -3.27299400 | -0.22568000 | 2.51202300  |
| C | -4.92770200 | -1.01507300 | 3.64382200  |
| H | -5.16573600 | -1.87747600 | 4.27653400  |
| H | -5.65382500 | -0.99755200 | 2.82430500  |
| H | -5.07303700 | -0.10665500 | 4.23860400  |
| C | -2.50826100 | -1.01388300 | 4.33286900  |
| H | -2.74344800 | -1.76290900 | 5.09747200  |
| H | -2.59515700 | -0.02943100 | 4.80383500  |
| H | -1.47185400 | -1.15325500 | 4.02097300  |
| C | -3.52452500 | -3.38367500 | -1.43310200 |
| H | -3.18975600 | -2.39583300 | -1.76696400 |
| C | -5.02230200 | -3.53065000 | -1.76675900 |
| H | -5.39660700 | -4.50712600 | -1.43872300 |
| H | -5.17976300 | -3.45283300 | -2.84842900 |

|   |             |             |             |
|---|-------------|-------------|-------------|
| H | -5.63511700 | -2.76174700 | -1.28504500 |
| C | -2.70918400 | -4.41547200 | -2.22397700 |
| H | -1.65017900 | -4.37657400 | -1.95860100 |
| H | -2.79841500 | -4.20780200 | -3.29524500 |
| H | -3.07470300 | -5.43554400 | -2.05821800 |
| C | -6.21803100 | 1.42675900  | -0.49451700 |
| C | -6.39422700 | 2.38310500  | 0.52096400  |
| C | -7.49050500 | 3.24094800  | 0.39045500  |
| H | -7.66681500 | 4.00050700  | 1.14480000  |
| C | -8.36086800 | 3.13203000  | -0.69241300 |
| H | -9.20819500 | 3.80685200  | -0.77088500 |
| C | -8.15367200 | 2.16802500  | -1.67542900 |
| H | -8.84122700 | 2.09777900  | -2.51218000 |
| C | -7.06403300 | 1.29324000  | -1.60429200 |
| C | -5.42895700 | 2.50623900  | 1.69307900  |
| H | -4.82737900 | 1.59308900  | 1.74066200  |
| C | -6.15965200 | 2.62781600  | 3.03914900  |
| H | -6.71898400 | 3.56625700  | 3.11682300  |
| H | -5.43159300 | 2.61334900  | 3.85701100  |
| H | -6.86128800 | 1.80077200  | 3.18990900  |
| C | -4.45398500 | 3.68010200  | 1.48377600  |
| H | -3.87417200 | 3.56627400  | 0.56319700  |
| H | -3.74227100 | 3.73360400  | 2.31404600  |
| H | -4.99543500 | 4.63132900  | 1.43049300  |
| C | -6.83130000 | 0.23717700  | -2.67360700 |
| H | -5.84463800 | -0.20661200 | -2.50540200 |
| C | -7.87297500 | -0.88993100 | -2.55927600 |
| H | -7.86062500 | -1.34763900 | -1.56368800 |
| H | -7.67144600 | -1.67477000 | -3.29613700 |
| H | -8.88482600 | -0.50844600 | -2.73619100 |
| C | -6.81803900 | 0.84233600  | -4.08630300 |
| H | -7.79423500 | 1.25856300  | -4.35777400 |
| H | -6.57117000 | 0.07045700  | -4.82281100 |
| H | -6.07516400 | 1.64221300  | -4.16742900 |
| C | 1.77117400  | -3.75897400 | -1.02715800 |
| C | 4.31807200  | -1.83276200 | -2.86855400 |
| C | 5.20582700  | 2.86020000  | 0.83301000  |
| C | -1.41998700 | -0.10345200 | -0.34989700 |
| C | 1.58499500  | 0.43816900  | -3.54371400 |
| C | 5.17641300  | -2.72433500 | -0.74260100 |
| C | 2.49555000  | 2.42278700  | 3.08236400  |
| C | 3.88540300  | -3.06215100 | 1.76453700  |
| C | 6.06465400  | -0.67130700 | -0.00486100 |
| C | 2.93999100  | -2.43383200 | 2.66907600  |

|   |             |             |             |
|---|-------------|-------------|-------------|
| C | 2.45038900  | -0.68570700 | -3.67906900 |
| C | 3.18285900  | -2.73001600 | -2.76626500 |
| C | 3.64344100  | 1.81283100  | -3.23170400 |
| C | -0.28714300 | -2.43038100 | -0.59680500 |
| C | 4.56964400  | 2.69918800  | 2.05728900  |
| C | 1.26743800  | 4.03239700  | 1.07696500  |
| C | 2.02632800  | -2.00138800 | -3.25255700 |
| C | -0.27705800 | -1.37367700 | 1.60279100  |
| C | 1.13216400  | 2.31412600  | 2.83846400  |
| C | 3.86010400  | -0.57673500 | -3.43507900 |
| C | 4.08297300  | -3.58662800 | -0.63550300 |
| C | 2.67281300  | -0.05493100 | 3.42076800  |
| C | 2.23376700  | 1.70682100  | -3.47487500 |
| C | 3.28034600  | 1.22560000  | 3.32504500  |
| C | 2.60472000  | 3.66965300  | -2.22216200 |
| C | 3.41784800  | -3.75751200 | 0.64640600  |
| C | 0.49385500  | 3.13055500  | 1.82031600  |
| C | -0.80927200 | -1.23081500 | -1.19789300 |
| C | 0.79635900  | -2.16417500 | -2.62838800 |
| C | 1.23437400  | -0.16232700 | 3.16073900  |
| C | 5.93109700  | 0.45999700  | 0.84484200  |
| C | -0.72212600 | 2.39330000  | -0.18395100 |
| C | 5.25689000  | 0.28882000  | 2.13875700  |
| C | -0.27268200 | 1.35993500  | -2.18869100 |
| C | 3.87917100  | 3.01822700  | -2.45569200 |
| C | 4.55853700  | 1.39532600  | 2.69514500  |
| C | 4.59403200  | 3.67810500  | -0.19654900 |
| C | 0.27804000  | 0.26464300  | -2.91715400 |
| C | 2.34707600  | 4.29473700  | -0.99991800 |
| C | -0.50900600 | 1.00098800  | 1.81535100  |
| C | 3.36514900  | 4.29964900  | 0.03732400  |
| C | 0.73138900  | -1.37432300 | 2.62464900  |
| C | 1.05545800  | 4.12018500  | -0.35552600 |
| C | 2.69819000  | 4.12922700  | 1.31890400  |
| C | 5.29161900  | -1.82923300 | -1.87940200 |
| C | -0.07867600 | -2.55699300 | 0.77537400  |
| C | 1.08052300  | -3.26253800 | 1.27164200  |
| C | 5.64825800  | -1.99487000 | 0.41872700  |
| C | 1.57732500  | -2.52995700 | 2.42394900  |
| C | 5.84724900  | 1.72358400  | 0.19953900  |
| C | 0.66089700  | -3.06025100 | -1.51015200 |
| C | 0.08209200  | 3.32790100  | -0.96610000 |
| C | 1.59067200  | 2.83779200  | -2.84140600 |
| C | 3.49904000  | -1.17181400 | 3.12017000  |

|   |             |             |             |
|---|-------------|-------------|-------------|
| C | -0.84571800 | -0.17997600 | 1.12418700  |
| C | 1.98889500  | -3.87829200 | 0.40117000  |
| C | -0.99526900 | 1.22932700  | -0.98070700 |
| C | 4.77693700  | -1.00239500 | 2.49042800  |
| C | 4.45861600  | 0.65998100  | -3.07357600 |
| C | 4.85153100  | 3.02245200  | -1.46559100 |
| C | -0.53773900 | 2.32585400  | 1.19945000  |
| C | 3.29978400  | 3.35234300  | 2.31136700  |
| C | 5.01232900  | -2.15779800 | 1.64290000  |
| C | 3.06229100  | -3.58829200 | -1.67168800 |
| C | 0.50656100  | 1.01001900  | 2.83326900  |
| C | 0.36376500  | 2.67089000  | -2.21586300 |
| C | 5.63207600  | 1.82470100  | -1.21592800 |
| C | -0.07484600 | -1.01748300 | -2.39592900 |
| C | 5.48628200  | 0.66417800  | -2.02344700 |
| C | 5.84895000  | -0.57042900 | -1.42033800 |
| N | -3.78748900 | -1.07022300 | 0.26961900  |
| N | -5.07282500 | 0.55722200  | -0.38666700 |
| H | -5.91853400 | -1.17511500 | 0.56531800  |

**nNHC-Sc<sub>3</sub>N@C<sub>80</sub>-[6,6,6]**

|   |             |             |             |
|---|-------------|-------------|-------------|
| C | -1.93880700 | -0.86488100 | -1.24604300 |
| C | -1.35546400 | -2.15110200 | -1.06062300 |
| C | -1.11423200 | -2.74633800 | 0.21655500  |
| C | -1.42345500 | -1.92024100 | 1.34037700  |
| C | -2.00024800 | -0.62261700 | 1.23385100  |
| C | -2.54651900 | -0.06664600 | -0.08668500 |
| C | -1.90383800 | 1.27938000  | -0.20802100 |
| C | -1.42106500 | 1.84971500  | -1.42272600 |
| C | -1.21853800 | 1.09939500  | -2.63133000 |
| C | -1.52767100 | -0.32553100 | -2.52336300 |
| C | -0.60731200 | -1.31046500 | -3.10643800 |
| C | -0.52059600 | -2.42172900 | -2.18803600 |
| C | 0.63064000  | -3.27184100 | -2.05589000 |
| C | 0.84563900  | -3.89593300 | -0.79656900 |
| C | -0.01469000 | -3.62469300 | 0.33122500  |
| C | 0.78780600  | -3.66628200 | 1.53250700  |
| C | 0.51548200  | -2.80410200 | 2.63067700  |
| C | -0.63988800 | -1.95553000 | 2.53788000  |
| C | -0.75560600 | -0.68057200 | 3.20590000  |
| C | -1.62750800 | 0.16410700  | 2.38355100  |
| C | -1.32371700 | 1.58127400  | 2.22556100  |
| C | -1.47103900 | 2.08092900  | 0.89046800  |
| C | -0.70145100 | 3.17814700  | 0.34668000  |

|   |             |             |             |
|---|-------------|-------------|-------------|
| C | -0.66823500 | 3.03732200  | -1.06887900 |
| C | 0.48840900  | 3.39775100  | -1.82380400 |
| C | 0.76704100  | 2.61835000  | -2.99665800 |
| C | -0.05858300 | 1.48839300  | -3.38922300 |
| C | 0.82639200  | 0.49623600  | -3.98400200 |
| C | 0.59128600  | -0.91389300 | -3.81974300 |
| C | 1.73884000  | -1.76010700 | -3.70907500 |
| C | 1.74961500  | -2.94505500 | -2.87108300 |
| C | 3.07993800  | -3.12693200 | -2.37288500 |
| C | 3.29672400  | -3.64269400 | -1.05912200 |
| C | 2.18465200  | -4.08009400 | -0.29496300 |
| C | 2.14805700  | -3.93561900 | 1.14436900  |
| C | 3.22328800  | -3.34676600 | 1.85986700  |
| C | 2.94928300  | -2.58332900 | 3.03446300  |
| C | 1.59655000  | -2.31344900 | 3.41532700  |
| C | 1.54998100  | -0.98607800 | 4.00237500  |
| C | 0.40032700  | -0.14344500 | 3.89647400  |
| C | 0.63304200  | 1.27553900  | 3.79131200  |
| C | -0.21382500 | 2.12465700  | 2.96255700  |
| C | 0.63712700  | 3.15231100  | 2.38844000  |
| C | 0.41803600  | 3.68527900  | 1.07273200  |
| C | 1.53766100  | 4.12520900  | 0.32181600  |
| C | 1.57271300  | 3.98281100  | -1.11841600 |
| C | 2.93072100  | 3.70576000  | -1.50158400 |
| C | 3.22019700  | 2.84858900  | -2.60313100 |
| C | 2.12292300  | 2.33927800  | -3.37199300 |
| C | 2.16856800  | 1.03622500  | -3.98099300 |
| C | 3.30483400  | 0.18907600  | -3.81711600 |
| C | 3.07605500  | -1.21801500 | -3.72274900 |
| C | 3.90222200  | -2.06036300 | -2.89953000 |
| C | 4.97627400  | -1.50524300 | -2.13648200 |
| C | 5.30634000  | -2.10629700 | -0.86659500 |
| C | 4.41641100  | -3.10552000 | -0.33007700 |
| C | 4.37124200  | -2.95427300 | 1.09080700  |
| C | 5.21673600  | -1.84989600 | 1.45597600  |
| C | 4.85759300  | -1.02542800 | 2.58565900  |
| C | 3.75275200  | -1.43368000 | 3.38972400  |
| C | 2.89006800  | -0.44813100 | 3.98374800  |
| C | 3.12128500  | 0.95069300  | 3.80591800  |
| C | 1.97933300  | 1.80538500  | 3.73662700  |
| C | 1.97101700  | 2.96118200  | 2.87897700  |
| C | 3.10783600  | 3.31728700  | 2.08333900  |
| C | 2.87423100  | 3.93830200  | 0.82044400  |
| C | 3.73570300  | 3.69138600  | -0.30611600 |

|   |             |             |             |
|---|-------------|-------------|-------------|
| C | 4.84547300  | 2.80789600  | -0.18787900 |
| C | 5.18691400  | 2.01772000  | -1.32684700 |
| C | 4.39164500  | 2.03723500  | -2.52310600 |
| C | 4.42948000  | 0.72944200  | -3.12226300 |
| C | 5.23436300  | -0.11080500 | -2.28215900 |
| C | 5.71218700  | 0.68543700  | -1.16926500 |
| C | 5.98201400  | 0.11163600  | 0.11337900  |
| C | 5.83193900  | -1.32624800 | 0.24904300  |
| C | 5.65462700  | 0.92484800  | 1.24145200  |
| C | 5.13154100  | 0.36828700  | 2.47626300  |
| C | 4.28706200  | 1.35334000  | 3.08390800  |
| C | 4.27875200  | 2.51587100  | 2.22911400  |
| C | 5.12677300  | 2.25980400  | 1.10054000  |
| C | -6.20535200 | 0.64972300  | -0.34216100 |
| C | -6.21350400 | -0.70380800 | -0.31236600 |
| H | -7.01716200 | -1.41820200 | -0.35111000 |
| C | -4.07664200 | -0.03374200 | -0.15130300 |
| C | -4.52972400 | -2.50679100 | -0.01051000 |
| C | -4.45004600 | -2.99190700 | 1.30806700  |
| C | -4.11082800 | -4.33911100 | 1.46294100  |
| H | -4.01742900 | -4.75419900 | 2.45981300  |
| C | -3.87810600 | -5.15069400 | 0.35587600  |
| H | -3.60082900 | -6.19051200 | 0.50064900  |
| C | -4.00180100 | -4.64336000 | -0.93435700 |
| H | -3.82394400 | -5.29274800 | -1.78374300 |
| C | -4.33848800 | -3.30322600 | -1.15178700 |
| C | -4.78351900 | -2.11948000 | 2.51237100  |
| H | -4.53405800 | -1.08367800 | 2.26146200  |
| C | -3.98349900 | -2.47766000 | 3.77243200  |
| H | -2.91167600 | -2.52242700 | 3.57229600  |
| H | -4.29917200 | -3.44041700 | 4.18967500  |
| H | -4.15556100 | -1.71827500 | 4.54233500  |
| C | -6.29306300 | -2.18390200 | 2.82166000  |
| H | -6.53333700 | -1.53061200 | 3.66803200  |
| H | -6.58518800 | -3.20614500 | 3.08710700  |
| H | -6.90627100 | -1.87008500 | 1.97195700  |
| C | -4.55029000 | -2.76316000 | -2.55975400 |
| H | -4.33743500 | -1.68873300 | -2.54626900 |
| C | -6.01804200 | -2.95998200 | -2.99073400 |
| H | -6.17274000 | -2.56527100 | -4.00102600 |
| H | -6.72152000 | -2.45508400 | -2.32226000 |
| H | -6.27251500 | -4.02576400 | -2.99919400 |
| C | -3.62167200 | -3.39867400 | -3.60460000 |
| H | -3.70839700 | -2.85489000 | -4.55090700 |



|    |             |             |             |
|----|-------------|-------------|-------------|
| H  | -3.89383700 | -4.44152800 | -3.80270200 |
| H  | -2.57748700 | -3.36839100 | -3.28956200 |
| C  | -4.55690500 | 2.46997200  | -0.10492700 |
| C  | -4.36787000 | 3.22505400  | -1.27501000 |
| C  | -4.15258500 | 4.59752200  | -1.11165300 |
| H  | -3.98110700 | 5.21636900  | -1.98442300 |
| C  | -4.14034500 | 5.17744500  | 0.15276600  |
| H  | -3.96458700 | 6.24409900  | 0.25478100  |
| C  | -4.33828500 | 4.39832800  | 1.28905000  |
| H  | -4.31044300 | 4.86530600  | 2.26646500  |
| C  | -4.55189700 | 3.02021200  | 1.19143000  |
| C  | -4.41099900 | 2.60059200  | -2.66391700 |
| H  | -4.04501800 | 1.57151100  | -2.57966000 |
| C  | -3.51180200 | 3.32668600  | -3.67759700 |
| H  | -3.94717200 | 4.28571700  | -3.98078700 |
| H  | -3.40870600 | 2.71505900  | -4.57945500 |
| H  | -2.51339700 | 3.51380100  | -3.27769400 |
| C  | -5.85352000 | 2.55169000  | -3.20722600 |
| H  | -6.27595200 | 3.56133500  | -3.26219700 |
| H  | -6.51451800 | 1.94238800  | -2.58469600 |
| H  | -5.86085300 | 2.12533900  | -4.21653400 |
| C  | -4.77601700 | 2.17530700  | 2.44162000  |
| H  | -4.35626700 | 1.18047600  | 2.25548600  |
| C  | -6.27802100 | 2.00999900  | 2.75074100  |
| H  | -6.73983300 | 2.98861500  | 2.92354600  |
| H  | -6.41041100 | 1.40768500  | 3.65663400  |
| H  | -6.82245600 | 1.51625400  | 1.94246700  |
| C  | -4.06943400 | 2.73469800  | 3.68639600  |
| H  | -4.57174800 | 3.63348800  | 4.06151500  |
| H  | -3.02403100 | 2.97851000  | 3.48840900  |
| H  | -4.09727700 | 1.98764500  | 4.48644000  |
| N  | 1.75662100  | -0.09884200 | 0.00882300  |
| N  | -4.89456300 | -1.11537000 | -0.19030300 |
| N  | -4.88036700 | 1.05679800  | -0.23480800 |
| Sc | 0.48577600  | 0.33971100  | 1.51238000  |
| Sc | 0.47828700  | 0.01985100  | -1.53473400 |
| Sc | 3.67144800  | -0.62228700 | -0.01031900 |
| H  | -6.99976900 | 1.37237500  | -0.41198200 |

**nNHC-Sc<sub>3</sub>N@C<sub>80</sub>-[5,6,6]**

|   |            |             |             |
|---|------------|-------------|-------------|
| C | 1.50744200 | -1.22428600 | -1.79498200 |
| C | 0.58103900 | -1.21258100 | -2.88953100 |
| C | 0.09937700 | -0.00179800 | -3.46805500 |
| C | 0.58470200 | 1.20992500  | -2.89248600 |

|   |             |             |             |
|---|-------------|-------------|-------------|
| C | 1.51614800  | 1.22595800  | -1.79996800 |
| C | 1.94516000  | 0.00082100  | -1.21076000 |
| C | 2.57771000  | 0.00005700  | 0.16122200  |
| C | 1.99290400  | -1.19271700 | 0.95210000  |
| C | 1.51123700  | -2.38746500 | 0.36438100  |
| C | 1.37565000  | -2.47543000 | -1.08764600 |
| C | 0.26848800  | -3.21481100 | -1.72053200 |
| C | -0.20370400 | -2.40525000 | -2.82977000 |
| C | -1.57149500 | -2.37344400 | -3.29165200 |
| C | -2.03183700 | -1.17692900 | -3.91783100 |
| C | -1.19684700 | -0.00297900 | -4.02273300 |
| C | -2.03141600 | 1.16953600  | -3.91802800 |
| C | -1.56956200 | 2.36748700  | -3.29567100 |
| C | -0.20141500 | 2.40077600  | -2.83303900 |
| C | 0.27159600  | 3.21269800  | -1.72527200 |
| C | 1.38684000  | 2.48089000  | -1.09420500 |
| C | 1.52001000  | 2.39322000  | 0.36060500  |
| C | 1.99143700  | 1.19354700  | 0.94879500  |
| C | 1.54403800  | 0.71788300  | 2.22790700  |
| C | 1.54406900  | -0.71598400 | 2.22879700  |
| C | 0.55812000  | -1.44319900 | 2.96937700  |
| C | 0.10623300  | -2.68387000 | 2.41978800  |
| C | 0.56148400  | -3.14444900 | 1.12926600  |
| C | -0.52352600 | -3.88296900 | 0.51077400  |
| C | -0.72477000 | -3.89783000 | -0.91776000 |
| C | -2.08610300 | -3.88931800 | -1.37344800 |
| C | -2.49985500 | -3.17437400 | -2.56971200 |
| C | -3.84945700 | -2.72581800 | -2.37742400 |
| C | -4.27509000 | -1.47422000 | -2.91105900 |
| C | -3.38543200 | -0.72784100 | -3.73063100 |
| C | -3.38626600 | 0.71873200  | -3.73202100 |
| C | -4.27755400 | 1.46547500  | -2.91593600 |
| C | -3.84766300 | 2.71667300  | -2.38385100 |
| C | -2.49856600 | 3.16955800  | -2.57617800 |
| C | -2.08604900 | 3.88465200  | -1.38045900 |
| C | -0.72468600 | 3.89058300  | -0.92212400 |
| C | -0.52258300 | 3.87999300  | 0.50598800  |
| C | 0.56497500  | 3.14586100  | 1.12552900  |
| C | 0.10795500  | 2.68435100  | 2.41627800  |
| C | 0.55823600  | 1.44424100  | 2.96797100  |
| C | -0.34204900 | 0.72009800  | 3.79379400  |
| C | -0.34225900 | -0.71957100 | 3.79412200  |
| C | -1.69888000 | -1.16646900 | 3.98433300  |
| C | -2.17661600 | -2.35367900 | 3.35743800  |

|   |             |             |             |
|---|-------------|-------------|-------------|
| C | -1.24006800 | -3.13639400 | 2.60727900  |
| C | -1.63851100 | -3.86212900 | 1.43118400  |
| C | -2.98615900 | -3.82871200 | 0.96304000  |
| C | -3.19446300 | -3.87825700 | -0.45121000 |
| C | -4.28226400 | -3.16680000 | -1.07125200 |
| C | -5.17092000 | -2.38070900 | -0.27903100 |
| C | -5.71061200 | -1.17019200 | -0.85575300 |
| C | -5.21225000 | -0.71898000 | -2.12739800 |
| C | -5.22269700 | 0.71291900  | -2.13308900 |
| C | -5.74115200 | 1.16860300  | -0.86767600 |
| C | -5.17483600 | 2.36456400  | -0.28736400 |
| C | -4.27845500 | 3.15146500  | -1.07530500 |
| C | -3.19273400 | 3.86737900  | -0.45664400 |
| C | -2.98387000 | 3.82094300  | 0.95714500  |
| C | -1.63738300 | 3.86008100  | 1.42656600  |
| C | -1.23934000 | 3.13430200  | 2.60242300  |
| C | -2.17514400 | 2.35020600  | 3.35301700  |
| C | -1.69873200 | 1.16523800  | 3.98295200  |
| C | -2.53427200 | -0.00133800 | 4.11132400  |
| C | -3.86458100 | -0.00349200 | 3.59942200  |
| C | -4.36518200 | -1.22284100 | 3.05076000  |
| C | -3.53912400 | -2.39119100 | 2.93905200  |
| C | -3.93735800 | -3.12408600 | 1.76082000  |
| C | -5.00723800 | -2.40205400 | 1.13611600  |
| C | -5.27652200 | -1.21808700 | 1.93213200  |
| C | -5.77509900 | -0.00755600 | 1.35739600  |
| C | -6.07481000 | -0.00484800 | -0.06477200 |
| C | -5.27539900 | 1.20480700  | 1.93107400  |
| C | -4.99789300 | 2.37894900  | 1.12702300  |
| C | -3.93061200 | 3.10864000  | 1.75165400  |
| C | -3.53731000 | 2.38250800  | 2.93177100  |
| C | -4.36551000 | 1.21480900  | 3.04895900  |
| C | 6.25514900  | 0.67087100  | 0.24255100  |
| C | 6.25257600  | -0.68280500 | 0.23831800  |
| H | 7.05021900  | -1.40497700 | 0.26586000  |
| C | 4.11198100  | -0.00161300 | 0.15944800  |
| C | 4.59392700  | -2.49490800 | 0.03892500  |
| C | 4.50276000  | -3.02393500 | -1.26072400 |
| C | 4.25162000  | -4.39674200 | -1.36376500 |
| H | 4.15554400  | -4.84834800 | -2.34411900 |
| C | 4.10141500  | -5.18629600 | -0.22838100 |
| H | 3.89493600  | -6.24725300 | -0.33403500 |
| C | 4.20733600  | -4.62635700 | 1.04261200  |
| H | 4.07634400  | -5.25388100 | 1.91671200  |

|   |            |             |             |
|---|------------|-------------|-------------|
| C | 4.46220500 | -3.26248200 | 1.20810100  |
| C | 4.69947600 | -2.16997600 | -2.50842800 |
| H | 4.34876700 | -1.15713000 | -2.28230600 |
| C | 3.89231000 | -2.66550600 | -3.71823900 |
| H | 2.84693400 | -2.84782900 | -3.46317200 |
| H | 4.31380600 | -3.58895900 | -4.13111700 |
| H | 3.92438300 | -1.91191500 | -4.51199400 |
| C | 6.19098300 | -2.08177100 | -2.88992900 |
| H | 6.31515000 | -1.46339600 | -3.78603500 |
| H | 6.58820900 | -3.07957400 | -3.10749100 |
| H | 6.79944800 | -1.64192900 | -2.09527700 |
| C | 4.59560800 | -2.65209400 | 2.59564900  |
| H | 4.33762700 | -1.59044400 | 2.52300300  |
| C | 6.04744200 | -2.75983500 | 3.10162800  |
| H | 6.13484500 | -2.31713200 | 4.09999500  |
| H | 6.75433000 | -2.24490200 | 2.44328200  |
| H | 6.35454000 | -3.80975000 | 3.16751000  |
| C | 3.63349100 | -3.27743900 | 3.61672100  |
| H | 3.63555100 | -2.68281000 | 4.53587900  |
| H | 3.93699700 | -4.29555100 | 3.88543300  |
| H | 2.60963000 | -3.31208900 | 3.23971600  |
| C | 4.60367400 | 2.49031900  | 0.05135900  |
| C | 4.47074200 | 3.25278300  | 1.22368900  |
| C | 4.22171300 | 4.61839100  | 1.06374500  |
| H | 4.09021400 | 5.24232700  | 1.94032900  |
| C | 4.12224000 | 5.18468500  | -0.20495700 |
| H | 3.92029900 | 6.24694200  | -0.30626900 |
| C | 4.27300200 | 4.39986300  | -1.34356300 |
| H | 4.18191800 | 4.85642400  | -2.32210700 |
| C | 4.51860200 | 3.02566500  | -1.24612300 |
| C | 4.59629000 | 2.63497700  | 2.60869800  |
| H | 4.33080000 | 1.57563300  | 2.53035000  |
| C | 3.63614400 | 3.26243900  | 3.63033300  |
| H | 3.94782600 | 4.27610800  | 3.90647100  |
| H | 3.62969700 | 2.66203300  | 4.54569200  |
| H | 2.61386000 | 3.30864700  | 3.25015100  |
| C | 6.04753100 | 2.72921400  | 3.11907800  |
| H | 6.36272600 | 3.77637200  | 3.19039100  |
| H | 6.75210700 | 2.21139400  | 2.46053600  |
| H | 6.12856600 | 2.28150500  | 4.11574700  |
| C | 4.71595100 | 2.17679300  | -2.49717600 |
| H | 4.36381400 | 1.16337400  | -2.27588300 |
| C | 6.20793700 | 2.08859800  | -2.87690100 |
| H | 6.60629100 | 3.08678500  | -3.09061000 |

|    |             |             |             |
|----|-------------|-------------|-------------|
| H  | 6.33289200  | 1.47305800  | -3.77484000 |
| H  | 6.81496800  | 1.64575700  | -2.08282100 |
| C  | 3.91118400  | 2.67839900  | -3.70615100 |
| H  | 4.33379600  | 3.60366100  | -4.11379200 |
| H  | 2.86540400  | 2.85990100  | -3.45213400 |
| H  | 3.94461600  | 1.92859800  | -4.50344300 |
| N  | -1.84591000 | 0.01358900  | -0.28917500 |
| N  | 4.92720900  | -1.08848800 | 0.17408200  |
| N  | 4.93128100  | 1.08201900  | 0.18063900  |
| Sc | -0.54274000 | 1.53139500  | -0.42988700 |
| Sc | -0.58024200 | -1.54880900 | -0.42963800 |
| Sc | -3.79818000 | 0.09890600  | -0.05266100 |
| H  | 7.05552200  | 1.38983100  | 0.27448500  |

**aNHC-Sc<sub>3</sub>N@C<sub>80</sub>-[6,6,6]**

|   |             |             |             |
|---|-------------|-------------|-------------|
| C | 1.55394200  | 0.71775000  | -1.24342200 |
| C | 0.93086100  | 1.99733000  | -1.20749100 |
| C | 0.62789500  | 2.69939000  | 0.00126700  |
| C | 0.93113400  | 1.99619200  | 1.20926200  |
| C | 1.55401200  | 0.71647100  | 1.24362800  |
| C | 2.15297500  | 0.06115800  | -0.00025000 |
| C | 1.57464700  | -1.32203600 | -0.00094700 |
| C | 1.16480400  | -2.03482100 | -1.16746400 |
| C | 0.96089500  | -1.40729600 | -2.44640200 |
| C | 1.19622600  | 0.03604100  | -2.46314200 |
| C | 0.26399900  | 0.92212700  | -3.17138500 |
| C | 0.11661300  | 2.12026700  | -2.37752200 |
| C | -1.07293100 | 2.92500100  | -2.35538000 |
| C | -1.34764900 | 3.66098100  | -1.16897300 |
| C | -0.51001400 | 3.53681400  | 0.00177200  |
| C | -1.34751100 | 3.65976500  | 1.17276800  |
| C | -1.07264700 | 2.92248500  | 2.35835000  |
| C | 0.11693700  | 2.11785300  | 2.37949100  |
| C | 0.26415400  | 0.91871300  | 3.17183300  |
| C | 1.19620100  | 0.03339300  | 2.46250200  |
| C | 0.96115000  | -1.40990800 | 2.44450600  |
| C | 1.16486300  | -2.03603300 | 1.16486700  |
| C | 0.44292800  | -3.20975100 | 0.70988100  |
| C | 0.44286800  | -3.20901000 | -0.71365100 |
| C | -0.68133600 | -3.68047100 | -1.45690000 |
| C | -0.95764300 | -3.02626100 | -2.70481600 |
| C | -0.16077100 | -1.91405400 | -3.19472500 |
| C | -1.06632100 | -1.02109500 | -3.90816400 |
| C | -0.89262700 | 0.40851800  | -3.87766200 |

|   |             |             |             |
|---|-------------|-------------|-------------|
| C | -2.07550200 | 1.21188600  | -3.87672600 |
| C | -2.15589800 | 2.47078700  | -3.15852800 |
| C | -3.50631900 | 2.64574100  | -2.71674800 |
| C | -3.77814500 | 3.27840100  | -1.46613800 |
| C | -2.70579100 | 3.83423500  | -0.72160200 |
| C | -2.70568400 | 3.83345600  | 0.72578700  |
| C | -3.77793500 | 3.27677700  | 1.46988300  |
| C | -3.50602000 | 2.64282000  | 2.71979800  |
| C | -2.15552900 | 2.46738300  | 3.16113700  |
| C | -2.07506000 | 1.20776000  | 3.87804600  |
| C | -0.89220400 | 0.40440900  | 3.87793600  |
| C | -1.06580300 | -1.02527100 | 3.90711200  |
| C | -0.16030700 | -1.91749800 | 3.19263700  |
| C | -0.95733400 | -3.02901600 | 2.70143500  |
| C | -0.68117000 | -3.68198000 | 1.45279700  |
| C | -1.76283800 | -4.23640000 | 0.72148500  |
| C | -1.76292400 | -4.23563600 | -0.72597800 |
| C | -3.11900600 | -4.05372300 | -1.16891800 |
| C | -3.41101700 | -3.32082900 | -2.35623200 |
| C | -2.31155000 | -2.84211400 | -3.14025700 |
| C | -2.38888300 | -1.60980000 | -3.87833700 |
| C | -3.56322600 | -0.79934300 | -3.83214400 |
| C | -3.39178700 | 0.61836600  | -3.87444400 |
| C | -4.27349800 | 1.50327000  | -3.16148800 |
| C | -5.34064000 | 0.97677800  | -2.37201800 |
| C | -5.71641500 | 1.67874900  | -1.16799500 |
| C | -4.89281100 | 2.76856200  | -0.71338100 |
| C | -4.89258100 | 2.76768500  | 0.71670200  |
| C | -5.71580700 | 1.67718900  | 1.17020800  |
| C | -5.34034700 | 0.97416800  | 2.37373500  |
| C | -4.27319700 | 1.49994600  | 3.16357200  |
| C | -3.39137600 | 0.61428700  | 3.87545200  |
| C | -3.56281500 | -0.80337800 | 3.83160300  |
| C | -2.38841100 | -1.61385900 | 3.87666600  |
| C | -2.31118700 | -2.84537200 | 3.13725500  |
| C | -3.41077400 | -3.32332200 | 2.35294500  |
| C | -3.11888000 | -4.05497300 | 1.16482500  |
| C | -3.95735800 | -3.95641700 | -0.00192700 |
| C | -5.10318300 | -3.11140000 | -0.00137300 |
| C | -5.44207000 | -2.45087900 | -1.22104300 |
| C | -4.61498700 | -2.55636200 | -2.38960500 |
| C | -4.68982600 | -1.31710400 | -3.12109700 |
| C | -5.55121000 | -0.43247600 | -2.39250600 |
| C | -6.02258600 | -1.13177900 | -1.21184100 |

|   |             |             |             |
|---|-------------|-------------|-------------|
| C | -6.34897900 | -0.44694700 | 0.00016400  |
| C | -6.26066700 | 1.00244500  | 0.00085900  |
| C | -6.02249600 | -1.13304500 | 1.21139600  |
| C | -5.55115500 | -0.43506500 | 2.39290800  |
| C | -4.68958900 | -1.32045200 | 3.12029800  |
| C | -4.61475700 | -2.55894600 | 2.38738800  |
| C | -5.44193200 | -2.45217000 | 1.21904000  |
| C | 3.66467300  | -0.00261000 | -0.00035200 |
| C | 4.45909000  | -1.11632200 | -0.00108800 |
| H | 4.19726800  | -2.16104000 | -0.00177100 |
| C | 5.80157700  | 0.64232000  | 0.00013200  |
| H | 6.68772000  | 1.25353700  | 0.00061500  |
| C | 6.94191400  | -1.54877500 | -0.00094900 |
| C | 7.46277900  | -1.95053400 | 1.23910900  |
| C | 8.57546800  | -2.79783100 | 1.20905000  |
| H | 9.01229000  | -3.13594900 | 2.14322500  |
| C | 9.12452800  | -3.21570600 | -0.00137500 |
| H | 9.98666800  | -3.87599700 | -0.00154300 |
| C | 8.57599000  | -2.79652800 | -1.21158500 |
| H | 9.01321400  | -3.13364200 | -2.14593400 |
| C | 7.46330800  | -1.94920100 | -1.24121200 |
| C | 6.84899800  | -1.51430300 | 2.56129600  |
| H | 6.04414900  | -0.80223400 | 2.35286000  |
| C | 7.87537100  | -0.79223500 | 3.44991000  |
| H | 8.30364000  | 0.07674400  | 2.93872700  |
| H | 8.69983700  | -1.45567000 | 3.73271600  |
| H | 7.39677000  | -0.44442800 | 4.37152600  |
| C | 6.21553400  | -2.71215400 | 3.29102200  |
| H | 5.73748200  | -2.38155400 | 4.21926200  |
| H | 6.97011800  | -3.46395500 | 3.54742100  |
| H | 5.45473400  | -3.19712100 | 2.67038200  |
| C | 6.85010100  | -1.51157100 | -2.56320000 |
| H | 6.04471900  | -0.80023500 | -2.35432700 |
| C | 6.21776900  | -2.70878500 | -3.29494400 |
| H | 5.74015300  | -2.37718900 | -4.22305300 |
| H | 5.45682200  | -3.19499700 | -2.67545800 |
| H | 6.97291000  | -3.45984600 | -3.55186900 |
| C | 7.87664800  | -0.78772600 | -3.45016800 |
| H | 7.39847700  | -0.43896000 | -4.37164500 |
| H | 8.70169300  | -1.45031200 | -3.73328000 |
| H | 8.30406500  | 0.08081900  | -2.93752900 |
| C | 4.18612000  | 2.49785100  | 0.00140000  |
| C | 4.02794300  | 3.13652700  | -1.23975600 |
| C | 3.68181400  | 4.49067500  | -1.20744500 |

|    |             |             |             |
|----|-------------|-------------|-------------|
| H  | 3.53350100  | 5.02549800  | -2.13827000 |
| C  | 3.50521100  | 5.15506300  | 0.00368600  |
| H  | 3.22093700  | 6.20300100  | 0.00458400  |
| C  | 3.68246100  | 4.48876800  | 1.21366800  |
| H  | 3.53465200  | 5.02210500  | 2.14542900  |
| C  | 4.02855800  | 3.13455800  | 1.24363300  |
| C  | 4.26836300  | 2.40498200  | -2.55421100 |
| H  | 4.00587300  | 1.35188800  | -2.40541200 |
| C  | 5.75706700  | 2.48008100  | -2.94971500 |
| H  | 6.06073500  | 3.52120000  | -3.10649000 |
| H  | 5.93197400  | 1.93090500  | -3.88153500 |
| H  | 6.41522400  | 2.05583200  | -2.18412100 |
| C  | 3.39750800  | 2.92129600  | -3.70804500 |
| H  | 3.70703900  | 3.92163700  | -4.03136800 |
| H  | 2.34257000  | 2.95745500  | -3.42918500 |
| H  | 3.49835700  | 2.25400000  | -4.57004800 |
| C  | 4.26946600  | 2.40094200  | 2.55683000  |
| H  | 4.00746500  | 1.34796700  | 2.40633000  |
| C  | 3.39843900  | 2.91494500  | 3.71156900  |
| H  | 3.70760100  | 3.91484600  | 4.03659500  |
| H  | 3.49956100  | 2.24621500  | 4.57242800  |
| H  | 2.34349000  | 2.95119500  | 3.43277400  |
| C  | 5.75817500  | 2.47612000  | 2.95229200  |
| H  | 6.06129800  | 3.51711800  | 3.11092300  |
| H  | 6.41647300  | 2.05364000  | 2.18583300  |
| H  | 5.93349800  | 1.92534500  | 3.88308700  |
| N  | -2.13452700 | -0.08226900 | -0.00026800 |
| N  | 5.78021100  | -0.69344700 | -0.00070000 |
| N  | 4.53801300  | 1.09116200  | 0.00027700  |
| Sc | -0.85085900 | -0.31977900 | 1.53373700  |
| Sc | -0.85014700 | -0.31692300 | -1.53381300 |
| Sc | -4.06409900 | 0.37387400  | -0.00144100 |

**aNHC-Sc<sub>3</sub>N@C<sub>80</sub>-[5,6,6]**

|   |             |             |             |
|---|-------------|-------------|-------------|
| C | 1.20412000  | -0.83565300 | -1.94166000 |
| C | 0.25623100  | -0.67305800 | -3.00965300 |
| C | -0.31473000 | 0.59308700  | -3.34249600 |
| C | 0.09795600  | 1.70606500  | -2.55118500 |
| C | 1.02977100  | 1.56943800  | -1.47141000 |
| C | 1.53311900  | 0.28323400  | -1.12042400 |
| C | 2.18068600  | 0.06292100  | 0.22150000  |
| C | 1.66190600  | -1.27557700 | 0.77163500  |
| C | 1.30334900  | -2.38981900 | -0.02719200 |
| C | 1.16193600  | -2.20869600 | -1.47919400 |



|   |             |             |             |
|---|-------------|-------------|-------------|
| C | 0.07051300  | -2.86935500 | -2.22559900 |
| C | -0.46248300 | -1.89728100 | -3.16326800 |
| C | -1.83520200 | -1.86263600 | -3.61015700 |
| C | -2.37644900 | -0.60147400 | -4.00103300 |
| C | -1.61509700 | 0.61839000  | -3.88645700 |
| C | -2.51762300 | 1.69981300  | -3.56555200 |
| C | -2.12317000 | 2.78691000  | -2.72912100 |
| C | -0.75440700 | 2.81806500  | -2.27098700 |
| C | -0.31776500 | 3.43439000  | -1.03006500 |
| C | 0.83696300  | 2.65736100  | -0.54605700 |
| C | 1.00228800  | 2.30980400  | 0.86588500  |
| C | 1.56981300  | 1.06253300  | 1.22719100  |
| C | 1.15711900  | 0.33071800  | 2.39314500  |
| C | 1.22645700  | -1.07641200 | 2.12258900  |
| C | 0.30395800  | -1.99108900 | 2.71810500  |
| C | -0.07370100 | -3.13302900 | 1.94189400  |
| C | 0.39727800  | -3.32508900 | 0.58827600  |
| C | -0.65568800 | -3.99078700 | -0.15626700 |
| C | -0.87522400 | -3.74027300 | -1.55985600 |
| C | -2.23833400 | -3.73628800 | -2.01073700 |
| C | -2.70570900 | -2.83880100 | -3.05164000 |
| C | -4.07767300 | -2.51272300 | -2.77948400 |
| C | -4.58951700 | -1.21437400 | -3.07160100 |
| C | -3.75369800 | -0.27641900 | -3.73431800 |
| C | -3.83913800 | 1.14207800  | -3.46378800 |
| C | -4.76281100 | 1.66846300  | -2.52035000 |
| C | -4.40722200 | 2.82345800  | -1.76379000 |
| C | -3.08937000 | 3.38200800  | -1.87071100 |
| C | -2.70442400 | 3.88633400  | -0.56270400 |
| C | -1.34069900 | 3.89348400  | -0.11399900 |
| C | -1.12142500 | 3.62496100  | 1.28693100  |
| C | 0.01415300  | 2.85323500  | 1.75836600  |
| C | -0.39539000 | 2.13763100  | 2.94400800  |
| C | 0.13809100  | 0.84751100  | 3.25725300  |
| C | -0.71187900 | -0.07299700 | 3.92760100  |
| C | -0.62713100 | -1.48678400 | 3.66360200  |
| C | -1.95249800 | -2.04032300 | 3.76604600  |
| C | -2.36325600 | -3.11353200 | 2.92420200  |
| C | -1.39166900 | -3.68554700 | 2.04002900  |
| C | -1.75957500 | -4.20484200 | 0.75088700  |
| C | -3.11137000 | -4.16281900 | 0.29700900  |
| C | -3.33358700 | -3.96031600 | -1.10069400 |
| C | -4.46742000 | -3.20925600 | -1.57506000 |
| C | -5.40181600 | -2.63816600 | -0.65525600 |

|   |             |             |             |
|---|-------------|-------------|-------------|
| C | -6.04624400 | -1.39264900 | -1.00341900 |
| C | -5.57007400 | -0.67929400 | -2.16223200 |
| C | -5.64260800 | 0.72457900  | -1.88978700 |
| C | -6.14859000 | 0.90116400  | -0.55560000 |
| C | -5.67983400 | 2.01662700  | 0.23507500  |
| C | -4.84943000 | 2.98799300  | -0.39828000 |
| C | -3.79877300 | 3.63787000  | 0.34223700  |
| C | -3.57064600 | 3.33938800  | 1.72275200  |
| C | -2.22150400 | 3.36544800  | 2.18741000  |
| C | -1.76564600 | 2.46185500  | 3.20975000  |
| C | -2.64540000 | 1.49828600  | 3.80069800  |
| C | -2.09052000 | 0.24699600  | 4.19687800  |
| C | -2.85431000 | -0.96983000 | 4.10564000  |
| C | -4.18782200 | -0.95405200 | 3.60387000  |
| C | -4.62151700 | -2.07828500 | 2.83758500  |
| C | -3.72585000 | -3.15049000 | 2.50420300  |
| C | -4.08946800 | -3.66826900 | 1.21000300  |
| C | -5.20510500 | -2.90080700 | 0.73226500  |
| C | -5.54305400 | -1.91610300 | 1.74104700  |
| C | -6.11967800 | -0.65085700 | 1.40283100  |
| C | -6.43452400 | -0.40936700 | 0.00512800  |
| C | -5.68987400 | 0.46056500  | 2.19260200  |
| C | -5.50099900 | 1.78544500  | 1.62926000  |
| C | -4.46898500 | 2.44291700  | 2.37626500  |
| C | -4.01267700 | 1.52989300  | 3.39765700  |
| C | -4.76684300 | 0.31334600  | 3.29175900  |
| C | 4.49796100  | -1.06091900 | 0.46840400  |
| C | 3.69401600  | 0.01257400  | 0.19442100  |
| C | 5.82436300  | 0.60817900  | -0.11747600 |
| C | 4.20872800  | 2.38448500  | -0.61508500 |
| C | 4.04500200  | 2.58932900  | -1.99524600 |
| C | 3.71084900  | 3.88498200  | -2.40051000 |
| H | 3.56097400  | 4.09363300  | -3.45370600 |
| C | 3.54956300  | 4.90537300  | -1.46671400 |
| H | 3.27574900  | 5.90127600  | -1.80204600 |
| C | 3.72823400  | 4.66238100  | -0.10660400 |
| H | 3.59026200  | 5.46958400  | 0.60335000  |
| C | 4.06443800  | 3.38699600  | 0.35702900  |
| C | 4.26667200  | 1.47066800  | -3.00600500 |
| H | 4.05943400  | 0.51785600  | -2.50587300 |
| C | 5.73362700  | 1.45512100  | -3.48133000 |
| H | 6.44077400  | 1.33446600  | -2.65398100 |
| H | 5.98036800  | 2.39308100  | -3.99107800 |
| H | 5.89820300  | 0.63171600  | -4.18500100 |

|   |             |             |             |
|---|-------------|-------------|-------------|
| C | 3.33083200  | 1.54841700  | -4.22095700 |
| H | 3.44230400  | 0.64388500  | -4.82776000 |
| H | 3.57256400  | 2.40317200  | -4.86236600 |
| H | 2.28484500  | 1.63009900  | -3.92093600 |
| C | 4.30260100  | 3.10519100  | 1.83508800  |
| H | 4.01582200  | 2.06540100  | 2.02601800  |
| C | 3.45208000  | 3.97804200  | 2.76829000  |
| H | 3.56345900  | 3.62659200  | 3.79916200  |
| H | 2.39246400  | 3.93095200  | 2.50700400  |
| H | 3.77057200  | 5.02638600  | 2.74529900  |
| C | 5.79695900  | 3.26441100  | 2.18015900  |
| H | 5.97029000  | 3.03486500  | 3.23739000  |
| H | 6.12706600  | 4.29312200  | 1.99669800  |
| H | 6.43456500  | 2.60118600  | 1.58587400  |
| C | 6.97024700  | -1.52792100 | 0.36287200  |
| C | 7.67664000  | -1.56149600 | 1.57396000  |
| C | 8.78318900  | -2.41622800 | 1.63328600  |
| H | 9.36421300  | -2.47339800 | 2.54820000  |
| C | 9.14261400  | -3.19718100 | 0.53777800  |
| H | 10.00127000 | -3.85840200 | 0.60715200  |
| C | 8.41036000  | -3.14008400 | -0.64697900 |
| H | 8.70411700  | -3.75827600 | -1.48867000 |
| C | 7.30145100  | -2.29657800 | -0.76636500 |
| C | 7.28164700  | -0.71025400 | 2.77124300  |
| H | 6.34874600  | -0.18955700 | 2.53216800  |
| C | 8.34827000  | 0.36150100  | 3.05642500  |
| H | 9.30712300  | -0.09623300 | 3.32388600  |
| H | 8.03439100  | 1.00013900  | 3.88897900  |
| H | 8.51647400  | 1.00033000  | 2.18220200  |
| C | 7.00947000  | -1.57568400 | 4.01294700  |
| H | 7.91325000  | -2.09875700 | 4.34381500  |
| H | 6.23954800  | -2.32728300 | 3.81055300  |
| H | 6.66468800  | -0.94828100 | 4.84155800  |
| C | 6.47898700  | -2.24923800 | -2.04696200 |
| H | 5.83943000  | -1.36108700 | -2.01456200 |
| C | 5.55018200  | -3.47456200 | -2.14041900 |
| H | 6.13126500  | -4.40300600 | -2.16954700 |
| H | 4.94143300  | -3.42221100 | -3.04933600 |
| H | 4.86964700  | -3.52883400 | -1.28465600 |
| C | 7.35746100  | -2.11995400 | -3.30098600 |
| H | 7.97258800  | -3.01166300 | -3.46191700 |
| H | 8.02567500  | -1.25491500 | -3.23360900 |
| H | 6.72441800  | -1.99590400 | -4.18596500 |
| N | -2.21641900 | -0.13595000 | -0.21974100 |

|    |             |             |             |
|----|-------------|-------------|-------------|
| N  | 4.55994300  | 1.04990900  | -0.17300300 |
| N  | 5.81328600  | -0.67115500 | 0.26776700  |
| Sc | -1.05564900 | 1.51026000  | -0.08050900 |
| Sc | -0.79551000 | -1.49568700 | -0.62631500 |
| Sc | -4.15319000 | -0.39955400 | -0.00738000 |
| H  | 4.24359500  | -2.05959100 | 0.77928600  |
| H  | 6.70192300  | 1.18419600  | -0.35596100 |
